# Supplementary material
Source: Research Square preprint supplement (doi:10.21203/rs.3.rs-7084168/v1)
Supplement: Supplementary file 1 [file 7a4f25ad4abbe616369e13b6.docx]

**Supplementary files**

**Associations of activities of daily living disability and instrumental activities of daily living disability with all-cause mortality: Evidence from Five Major Longitudinal Studies**

**Running title: ADL/IADL and all-cause mortality**

**Heng Wang, MSc1,2, Cong Li, PhD3, Kaibo Yang, PhD2, Chingyu Cheng, PhD4, Jinghua Jiao, PhD5,#, Han Zhang, PhD2,#, Lei Liu, PhD3,6,#**

1. School of clinical medicine, China Medical University, Shenyang, China.

2. Department of Ophthalmology, First Hospital of China Medical University, Shenyang, China.

3. Department of ophthalmology, Guangdong Eye Institute, Guangdong Provincial People's Hospital (Guangdong Academy of Medical Sciences), Southern Medical University.

4. Singapore Eye Research Institute, Singapore National Eye Centre, Singapore; Centre for Innovation and Precision Eye Health, Yong Loo Lin School of Medicine, National University of Singapore, Singapore; Department of Ophthalmology, Yong Loo Lin School of Medicine, National University of Singapore, Singapore; Ophthalmology & Visual Sciences Academic Clinical Program (Eye ACP), Duke-NUS Medical School, Singapore.

5. Department of Anesthesiology, Guangzhou Eighth People's Hospital, Guangzhou Medical University.

6. Medical Big Data Center, Guangdong Provincial People's Hospital (Guangdong Academy of Medical Sciences), Southern Medical University, Guangzhou, China.

# Correspondence to Jinghua Jiao, Department of Anesthesiology, Guangzhou Eighth People's Hospital, Guangzhou Medical University. Email: jean0905@163.com; Han Zhang, Department of Ophthalmology, First Hospital of China Medical University, Shenyang, China. Email: zhanghan73@126.com; Lei Liu, Medical Big Data Center, Guangdong Provincial People's Hospital (Guangdong Academy of Medical Sciences), Southern Medical University, Guangzhou, China. Email: liulei@gdph.org.cn

**Brief introduction to all cohorts**

China Health and Retirement Longitudinal Study: The purpose of the China Health and Retirement Longitudinal Study (CHARLS) is to collect a set of high-quality microdata representing families and individuals of middle-aged and elderly people aged 45 years and older in China, so as to analyze the aging problem of the Chinese population and promote interdisciplinary research on the aging problem (1). The survey covers 150 county-level units, 450 village-level units, and about 17,000 people in 10,000 families. The survey included basic demographic information of respondents and their families, transfer payments between family members, respondents' health status, medical care and insurance, employment, income, expenditure, and assets. In addition, CHARLS includes 13 body measurements and blood sampling. CHARLS related data can be downloaded at the CHARLS home page at https://charls.pku.edu.cn/.

English Longitudinal Study of Ageing: The English Longitudinal Study of Ageing (ELSA) is a panel study of a representative cohort of men and women living in England aged ≥50 years (2). It was designed as a sister study to the Health and Retirement Study in the USA and is multidisciplinary in orientation, involving the collection of economic, social, psychological, cognitive, health, biological and genetic data. The study commenced in 2002, and the sample has been followed up every 2 years. Data are collected using computer-assisted personal interviews and self-completion questionnaires, with additional nurse visits for the assessment of biomarkers every 4 years. The original sample consisted of 11,391 members ranging in age from 50 to 100 years. ELSA is harmonized with ageing studies in other countries to facilitate international comparisons, and is linked to financial and health registry data. For more information about ELSA, visit http://www.elsa-project.ac.uk/ .

Health and Retirement Study: The Health and Retirement Study (HRS: https://hrs.isr.umich.edu/) is a nationally representative longitudinal survey of more than 37 000 individuals over age 50 in 23 000 households in the USA (3). The survey, which has been fielded every 2 years since 1992, was established to provide a national resource for data on the changing health and economic circumstances associated with ageing at both individual and population levels. Its multidisciplinary approach is focused on four broad topics—income and wealth; health, cognition and use of healthcare services; work and retirement; and family connections. HRS data are also linked at the individual level to administrative records from Social Security and Medicare, Veteran’s Administration, the National Death Index and employer-provided pension plan information. Since 2006, data collection has expanded to include biomarkers and genetics as well as much greater depth in psychology and social context. This blend of economic, health and psychosocial information provides unprecedented potential to study increasingly complex questions about ageing and retirement.

Mexican Health and Aging Study: The Mexican Health and Aging Study (MHAS: https://www.mhasweb.org/) was designed to prospectively evaluate the impact of disease on the health, function and mortality of adults over the age of 50 in both urban and rural areas of Mexico (4). The overall goal of the study is to examine the ageing process and its disease and disability burden in a large representative panel of older Mexicans, using a wide socioeconomic perspective. The study protocols and survey instruments are highly comparable to the U.S. Health and Retirement Study (HRS). The MHAS 2001 baseline is a national and urban-rural representative survey of individuals born in 1951 or earlier. Three waves of data have been collected so far: baseline in 2001 and follow-ups in 2003 and 2012.

SHARE: The Survey of Health, Ageing and Retirement in Europe (SHARE, https://share-eric.eu/), is a study used to investigate the impact of health, social, economic and environmental policies in the life course of European citizens (5). From 2004 to the present, 530,000 in-depth interviews have been conducted with 140,000 people over the age of 50 from 28 European countries and Israel.

**References**

(1). Zhao Y, Hu Y, Smith JP, Strauss J, Yang G. Cohort profile: the China Health and Retirement Longitudinal Study (CHARLS). *Int J Epidemiol* 2014; **43** (1): 61-8.

(2). Steptoe A, Breeze E, Banks J, Nazroo J. Cohort profile: the English longitudinal study of ageing. *Int J Epidemiol* 2013; **42** (6): 1640-8.

(3). Sonnega A, Faul JD, Ofstedal MB, Langa KM, Phillips JW, Weir DR. Cohort Profile: the Health and Retirement Study (HRS). *Int J Epidemiol* 2014; **43** (2): 576-85.

(4). Wong R, Michaels-Obregon A, Palloni A. Cohort Profile: The Mexican Health and Aging Study (MHAS). *Int J Epidemiol* 2017; **46** (2): e2.

(5). Börsch-Supan A, Brandt M, Hunkler C, et al. Data Resource Profile: the Survey of Health, Ageing and Retirement in Europe (SHARE). *Int J Epidemiol* 2013; **42** (4): 992-1001.

**Supplementary Figure S1. Start and end time of each cohort’s follow-up**

China Health and Retirement Longitudinal Study: waves 1 to 4, 2011-2019


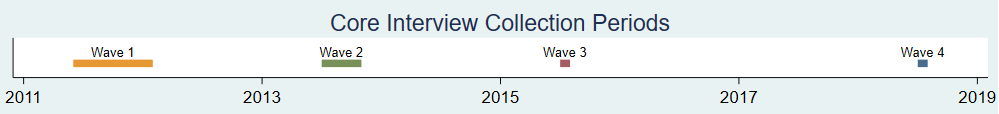


English Longitudinal Study of Ageing:waves 2 to 7, 2004-2014


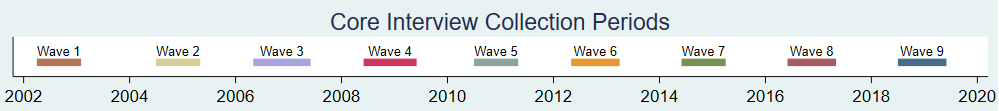


Health and Retirement Study: waves 10 to 15, 2010-2020


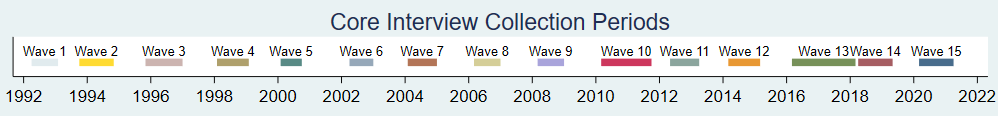


Mexican Health and Aging Study: waves 1 to 3, 2001-2013


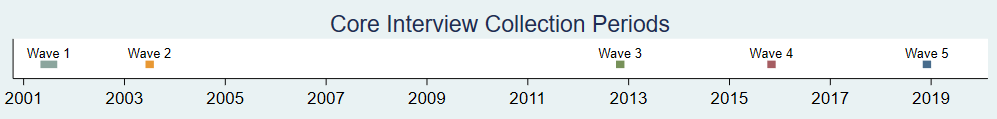


Survey of Health, Ageing and Retirement in Europe: waves 2 to 7, 2007-2017


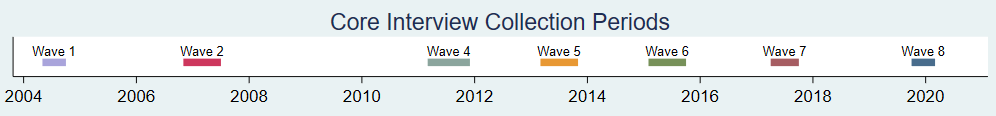


**Supplementary Table S1. Data coding and definition of covariates**

| **Covariates** | **Definition** |
| --- | --- |
| Age | The age of the individual is calculated using the year of birth and the year at the baseline of the cohort. |
| Gender | The gender is identified as male or female as reported in the dataset. |
| Education | According to the International Standard Classification of Education 1997, educational levels were a three-tier variable, including below high school, high school, and college and above. Different countries may have different definitions of education levels. We use the information from the harmonized dataset, which has been standardized through Global Aging Data. This ensures that education level information is comparable across different countries. |
| Marital status | Marital status was recoded as below:  Married: Married and living together with/ separated from spouse; Partnered. Never married.  Unmarried: Divorced; Widowed. |
| Region | Region variables indicate what region within its country the respondent lives in and whether they reside in an urban or rural area. |
| SES | Total Household Income is divided into four quartiles from low to high. Total Household Income represents the sum of all incomes received in the past year at the household level. |
| Alcohol Consumption | The level of alcohol consumption is categorized into 'ever' (including current drinkers, past drinkers, and those who used to drink but have now quit) and 'never' (those who have never consumed alcohol). |
| Smoking | Smoking is categorized into 'ever' (including current smokers, past smokers, and those who used to smoke but have now quit) and 'never' (those who have never smoked). |
| BMI | BMI, or Body Mass Index, can be determined through two methods. One is through actual measurements taken on-site, such as in a clinic or health fair. The second method is through self-reporting. |
| CES-D | HRS, ELSA, and SHARE use 8 items of CES-D, CHARLS uses 10 items of CES-D, and MHAS uses 7 items of CES-D. |

Abbreviations: CHARLS: China Health and Retirement Longitudinal Study; ELSA: English Longitudinal Study of Ageing; HRS: Health and Retirement Study; SHARE: Survey of Health, Ageing and Retirement in Europe; MHAS: Mexican Health and Aging Study; SES: Socioeconomic status; CES-D: Center for Epidemiologic Studies Depression.

**Supplementary Table S2. Definition of chronic diseases diagnosed by doctors in each cohort**

| **Chronic Diseases** | **Description** | **CHARLS** | **ELSA** | **HRS** | **MHAS** | **SHARE** |
| --- | --- | --- | --- | --- | --- | --- |
| Arthritis | Arthritis questions include questions capturing whether the respondent has ever been diagnosed with arthritis or rheumatism | ✓ | ✓ | ✓ | ✓ | ✓ |
| Cancer | Cancer questions include questions capturing whether the respondent has ever been diagnosed with cancer (or cancer or a malignant tumor of any kind except skin cancer) | ✓ | ✓ | ✓ | ✓ | ✓ |
| Diabetes | Diabetes questions include questions capturing whether the respondent has ever been diagnosed with diabetes (or high blood sugar) | ✓ | ✓ | ✓ | ✓ | ✓ |
| Heart conditions | Heart conditions questions include questions capturing whether the respondent has ever been diagnosed with either heart attack, coronary heart disease, angina, congestive heart failure or other heart problems | ✓ | ✓ | ✓ | X | ✓ |
| High blood pressure | High blood pressure variables include variables capturing whether the respondent has ever been diagnosed with high blood pressure (or hypertension) | ✓ | ✓ | ✓ | ✓ | ✓ |
| Lung disease | Lung disease questions include questions capturing whether the respondent has ever been diagnosed with chronic lung disease (except asthma) such as chronic bronchitis or emphysema | ✓ | ✓ | ✓ | ✓ | ✓ |
| Stroke | Stroke questions include questions capturing whether the respondent has ever been diagnosed with stroke or transient ischemic attack (TIA) | ✓ | ✓ | ✓ | ✓ | ✓ |

**Supplementary Table S3. Measurement methods and definition for ADL/IADL disability in each cohort**

| **Cohort** | **Variables** | **Description** |
| --- | --- | --- |
| CHARLS | ADL Variables | These variables pertain to questions regarding Activities of Daily Living (ADLs) and whether the respondent experiences some difficulty performing said tasks. This line of questioning is not asked to respondents who are younger than 50 and report good health as jointly defined by self-reported positive health and no self-reported disabilities. A code of 0 indicates that the respondent did not report any problems with the activity. A code of 1 indicates that the respondent reported some difficulty with the activity. In the CHARLS, these variables are recoded from 1.) No, I don’t have any difficulty, 2.) I have difficulty but can still do it, 3.) Yes, I have difficulty and need help, and 4.) I cannot do it. If the respondent answers 2, 3 or 4 to any difficulty with an activity, the variable is set to 1 for some difficulty. If the respondent answers 1, the variable is set to 0 for no difficulty. |
| IADL Variables | These variables pertain to questions regarding Instrumental Activities of Daily Living (IADLs) and whether the respondent experiences any difficulty performing said tasks. A code of 0 indicates that the respondent did not report any problems with the instrumental activity. A code of 1 indicates that the respondent reported some difficulty with the instrumental activity. In the CHARLS, these variables are recoded from 1.) No, I don’t have any difficulty, 2.) I have difficulty but can still do it, 3.) Yes, I have difficulty and need help and 4.) I cannot do it. If respondent answers 2, 3 or 4 to any difficulty with an activity, the variable is set to 1 for some difficulty. If respondent answers 1, the variable is set to 0 for no difficulty. |
| ELSA | ADL Variables | These variables indicate difficulty with activities of daily living (ADLs). A code of 0 indicates that the respondent did not report any problems with the activity. A code of 1 indicates that the respondent reported some difficulty with the activity. In the ELSA, respondents identify ADLs by selecting activities they have difficulty with from a card containing a list of activities. Respondents are asked to exclude any difficulties they expect to last less than three months. |
| IADL Variables | These variables indicate difficulty with instrumental activities of daily living (IADLs). A code of 0 indicates that the respondent did not report any problems with the instrumental activity. A code of 1 indicates that the respondent reported some difficulty with the instrumental activity. In the ELSA, respondents identify IADLs by selecting instrumental activities they have difficulty with from a card containing a list of activities. Respondents are asked to exclude any difficulties they expect to last less than three months. |
| HRS | ADL Variables | In the RAND HRS, the binary indicators of some difficulty with ADL’s are recoded from no, yes or can’t do. If the respondent answers yes or can’t do to whether they have any difficulty with an activity, the variable is set to 1 for some difficulty. If the respondent answers no, the variable is set to 0 for no difficulty. |
| IADL Variables | In the RAND HRS, the binary indicators of some difficulty with IADL’s are recoded from no, yes or can’t do. If the respondent answers yes or can’t do to whether they have any difficulty with an activity, the variable is set to 1 for some difficulty. If respondent answers no, the variable is set to 0 for no difficulty. |
| MHAS | ADL Variables | These variables indicate difficulty with activities of daily living (ADLs). A code of 0 indicates that the respondent did not report any problems with the activity. A code of 1 indicates that the respondent reported some difficulty with the activity or if they reported "can't do". |
| IADL Variables | These variables indicate difficulty with instrumental activities of daily living (IADLs). A code of 0 indicates that the respondent did not report any problems with the activity. A code of 1 indicates that either the respondent reported some difficulty with the activity or the respondent answered "Can't Do" or "Don't do" to the initial question about the activity and they answered that this was because of a health problem in the follow-up question. |
| SHARE | ADL Variables | These variables indicate difficulty with activities of daily living (ADLs). A code of 0 indicates that the respondent did not report any problems with the activity. A code of 1 indicates that the respondent reported some difficulty with the activity. |
| IADL Variables | These variables indicate difficulty with instrumental activities of daily living (IADLs). A code of 0 indicates that the respondent did not report any problems with the instrumental activity. A code of 1 indicates that the respondent reported some difficulty with the instrumental activity. |

**Supplementary Table S4. Complete ADL/IADL scales in each cohort**

|  | **CHARLS** | **ELSA** | **HRS** | **MHAS** | **SHARE** |
| --- | --- | --- | --- | --- | --- |
| ADL |  | Walk across room | Walk across room | Walk across room | Walk across room |
| Dressing | Dressing | Dressing | Dressing | Dressing |
| Bathing | Bathing | Bathing | Bathing | Bathing |
| Eating | Eating | Eating | Eating | Eating |
| Get in/out of bed | Get in/out of bed | Get in/out of bed | Get in/out of bed | Get in/out of bed |
| Using the toilet | Using the toilet | Using the toilet | Using the toilet | Using the toilet |
| Controlling urination and defecation |  |  |  |  |
| IADL |  | Use a map | Use a map |  | Use a map |
| Use telephone | Use telephone | Use telephone |  | Use telephone |
| Managing money | Managing money | Managing money | Managing money | Managing money |
| Take medications | Take medications | Take medications | Take medications | Take medications |
| Shop for grocery | Shop for grocery | Shop for grocery | Shop for grocery | Shop for grocery |
| Prepare hot meal | Prepare hot meal | Prepare hot meal | Prepare hot meal | Prepare hot meal |
| Doing work around the house or garden | Doing work around the house or garden |  |  | Doing work around the house or garden |
| To reconcile differences in design and culture between the cohorts, we selected relatively basic items to make up the final dataset (i.e., ADL include dressing, bathing, eating, getting in and out of bed, and using the toilet, while IADL include preparing hot meals, shopping, taking medication, and managing money) | | | | | |

Abbreviations: CHARLS: China Health and Retirement Longitudinal Study; ELSA: English Longitudinal Study of Ageing; HRS: Health and Retirement Study; SHARE: Survey of Health, Ageing and Retirement in Europe; MHAS: Mexican Health and Aging Study. ADL: Activities of Daily Living; IADL: Instrumental Activities of Daily Living

**
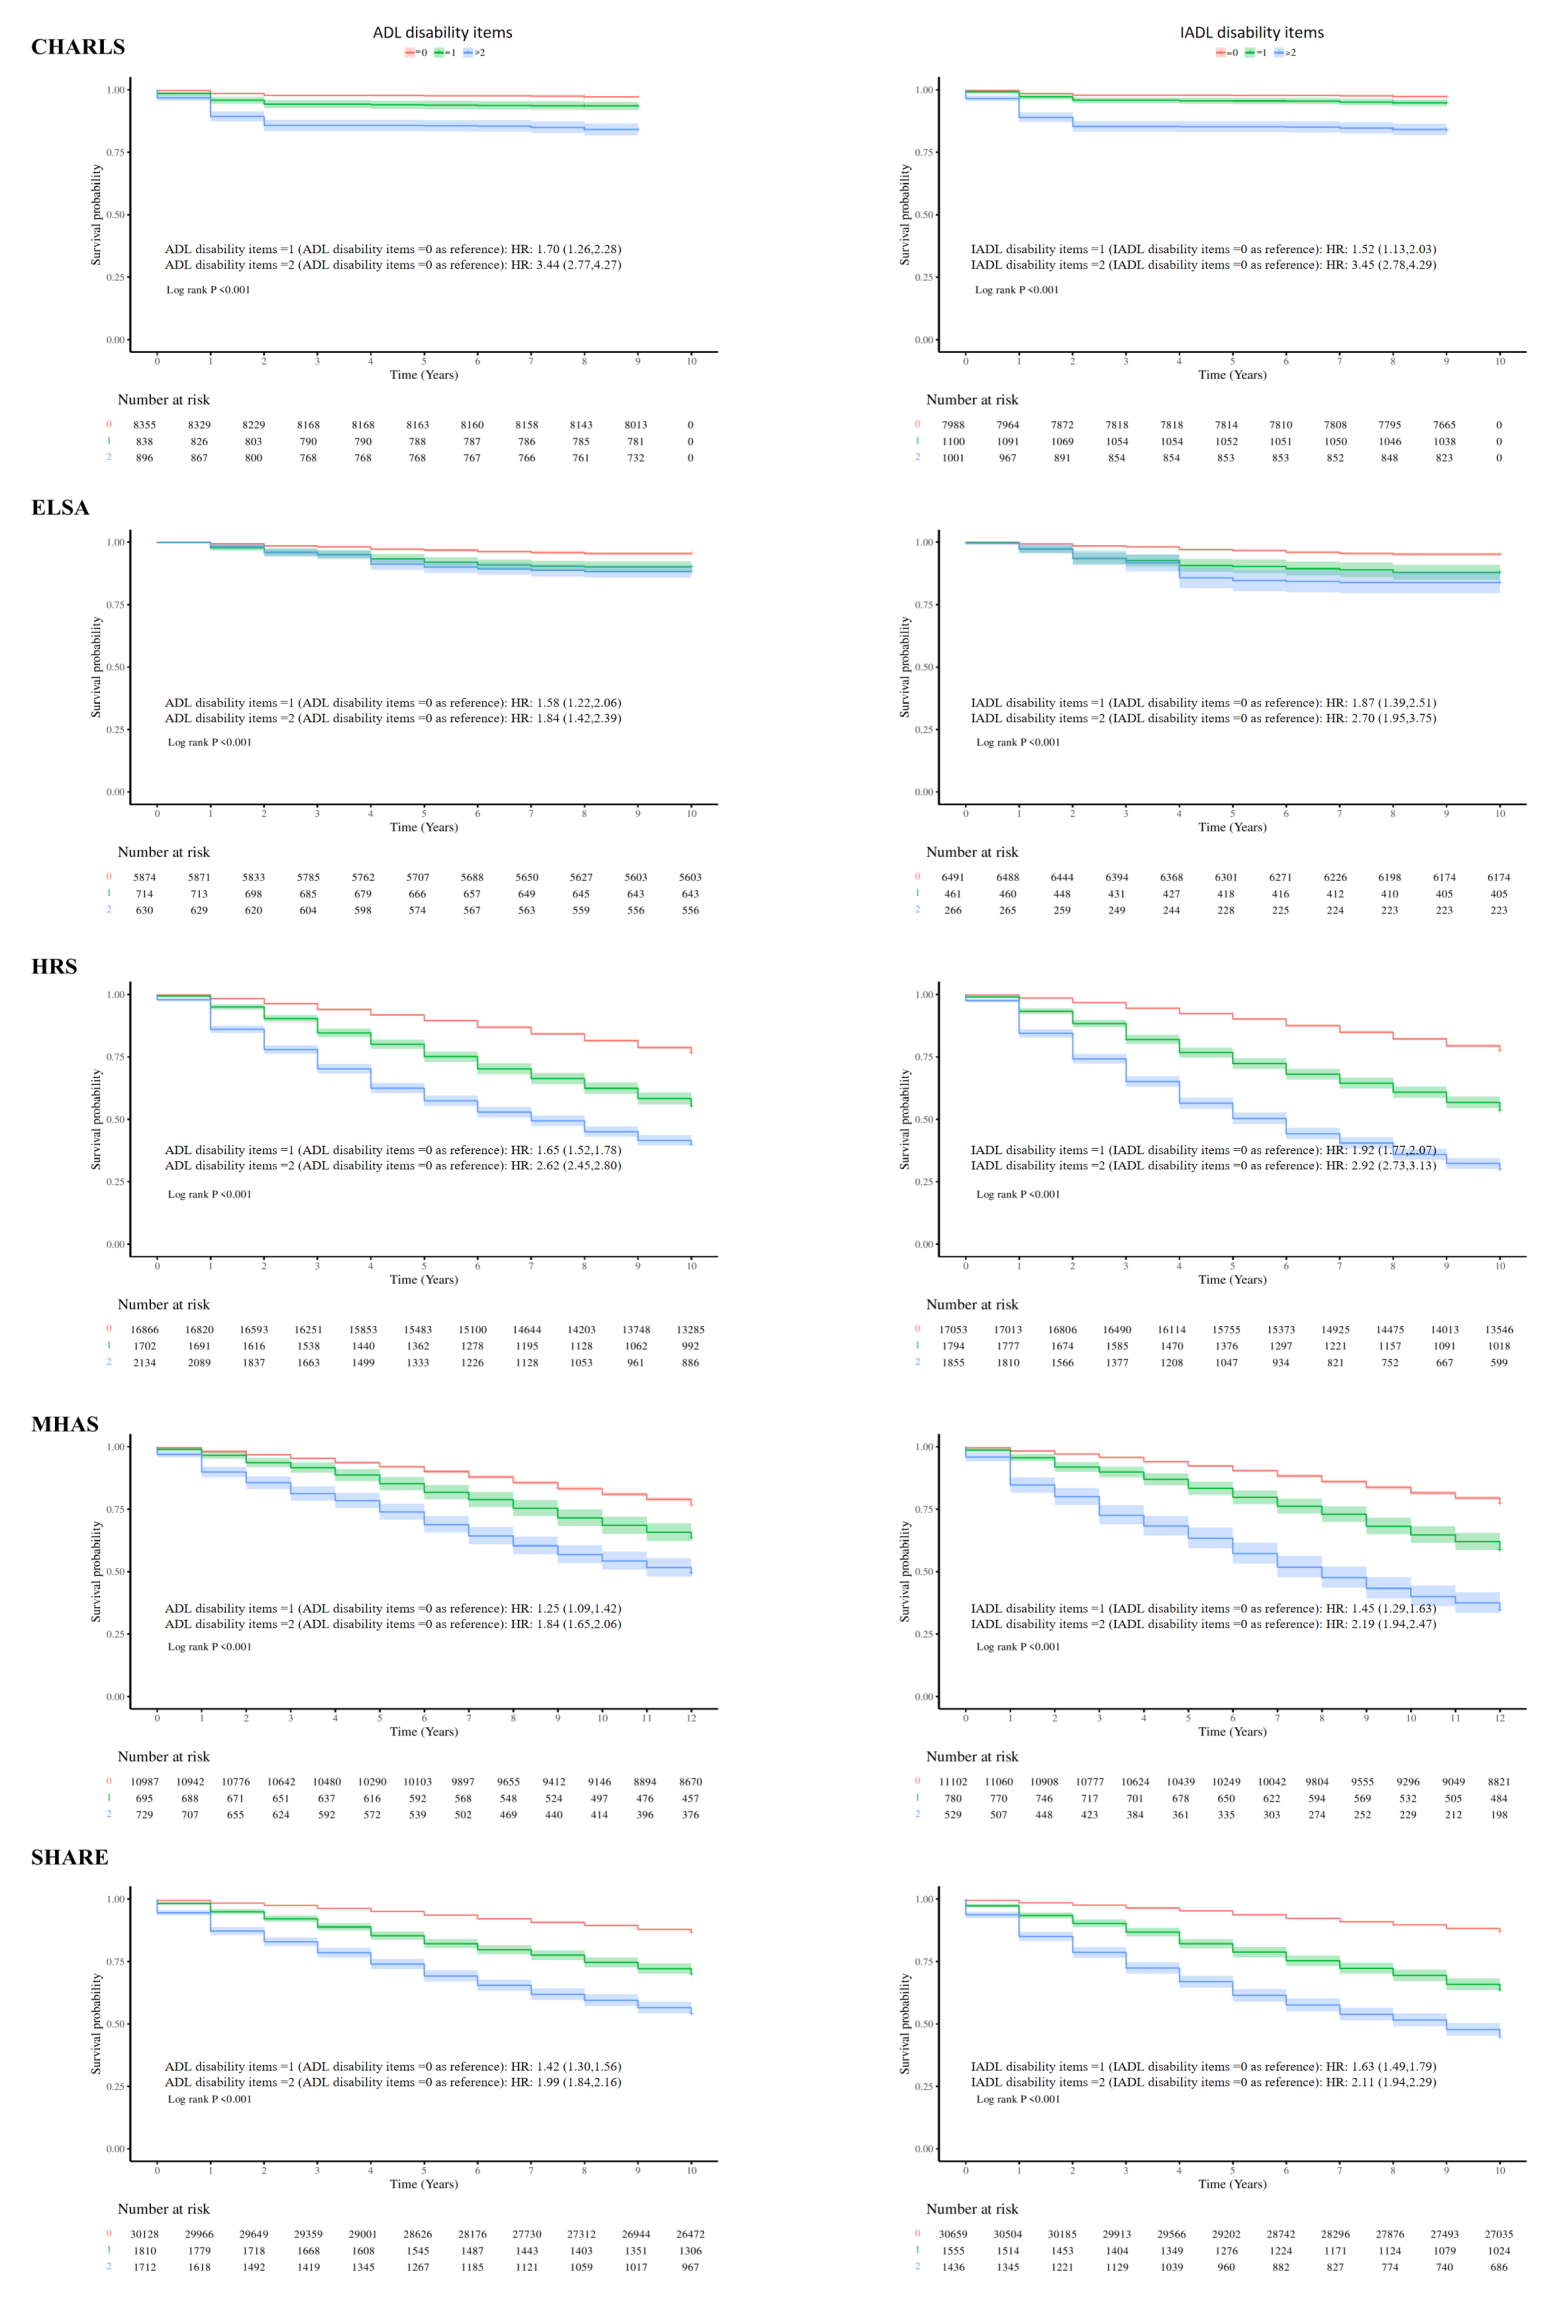
Supplementary Figure S2. Kaplan-Meier survival curves by different ADL/IADL status**

The hazard ratio and 95% confidence interval were calculated. The p-value was calculated using the log-rank test. The light-colored range in the figure represents the 95% confidence interval.

All models were adjusted for age, gender, region, education, marital status, alcohol consumption, smoking, BMI.

Abbreviations: CHARLS: China Health and Retirement Longitudinal Study; ELSA: English Longitudinal Study of Ageing; HRS: Health and Retirement Study; SHARE: Survey of Health, Ageing and Retirement in Europe; MHAS: Mexican Health and Aging Study. ADL: Activities of Daily Living; IADL: Instrumental Activities of Daily Living.

**Supplementary Figure S3. Directed Acyclic Graph**


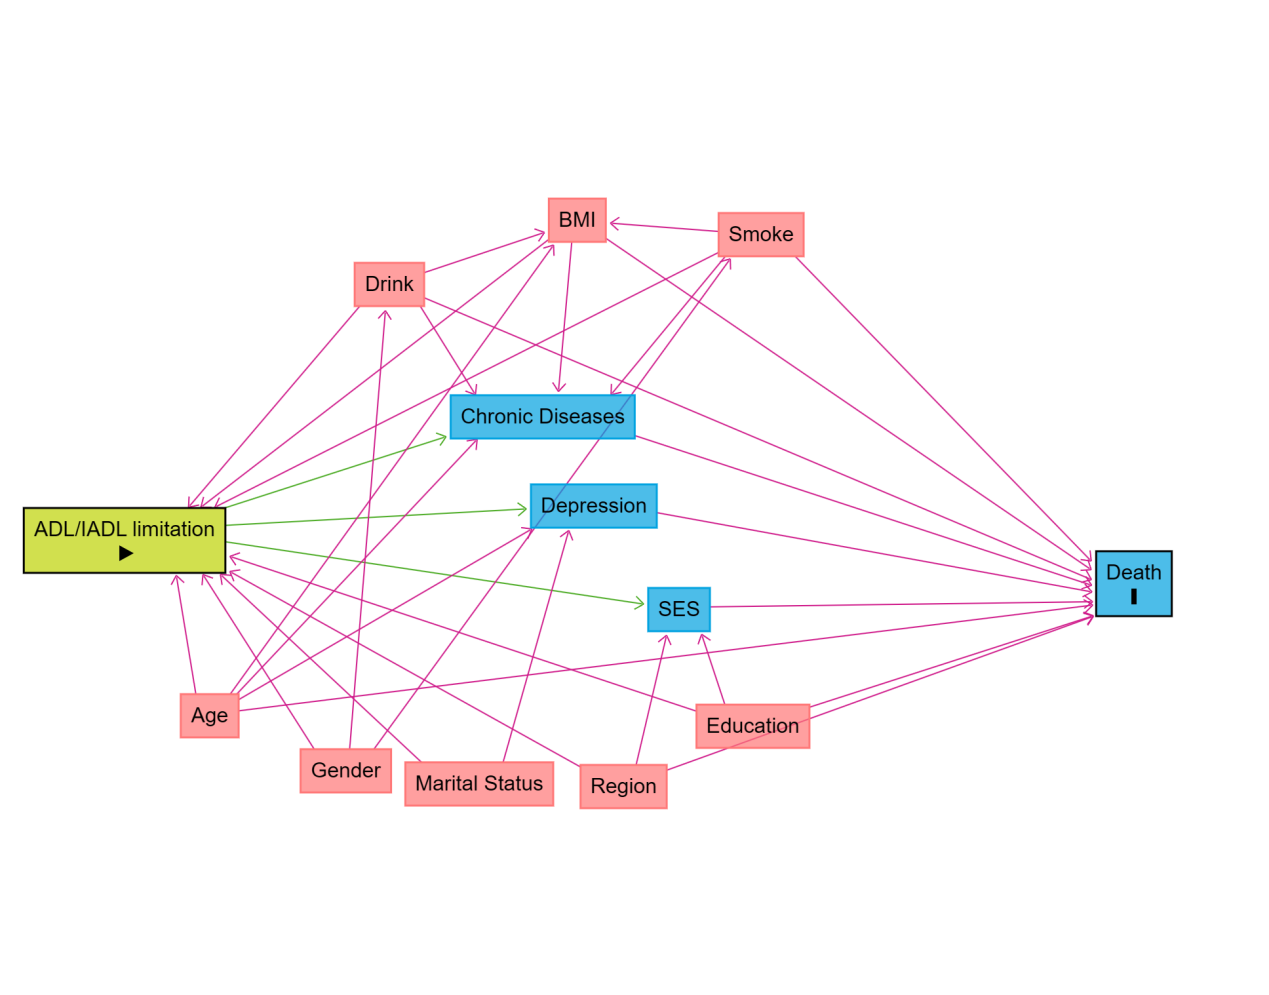


Abbreviations: ADL: Activities of Daily Living; IADL: Instrumental Activities of Daily Living; SES: Socioeconomic status; CES-D: Center for Epidemiologic Studies Depression Scale.

**Supplementary Table S5. Sensitivity analysis**

1. We used a complete case analysis and repeated the main analysis. Results are shown in the **Supplementary Table S13**
2. To exclude the influence of early death during follow-up on the study, we excluded participants who died within the first year of follow-up. Results are shown in the **Supplementary Table S14**
3. As the HRS follow-up period extended into the COVID-19 pandemic, we reanalyzed the data, taking the most recent follow-up before the pandemic (wave 14, 2018–2019) as the end of follow-up. Results are shown in the **Supplementary Table S15**
4. Considering that the concept of “chronic diseases diagnosed by a doctor” is inadequate to capture the true situation of chronic diseases when a large population does not have access to healthcare services, this concept may introduce bias when used for analysis in developed countries with advanced healthcare services. At the same time, “chronic diseases diagnosed by a doctor” are self-reported by patients in the questionnaire, so there is a risk of recall bias. Therefore, we re-analyzed the results excluding the covariate of chronic disease. Results are shown in the **Supplementary Table S16**
5. We used each cohort’s complete ADL/IADL scale data for independent analysis. Results are shown in the **Supplementary Table S17**

**Supplementary Table S6. Description of missing data for each cohort before multiple imputation**

| **Cohort** | **CHARLS (n=10,089)** | | **ELSA (n=7,218)** | | **HRS (n=20,702)** | | **MHAS (n=12,411)** | | **SHARE (n=33,650)** | |
| --- | --- | --- | --- | --- | --- | --- | --- | --- | --- | --- |
| Variable | Missing | % | Missing | % | Missing | % | Missing | % | Missing | % |
| BMI | 1883 | 18.9 | 1304 | 18.1 | 12734 | 61.5 | 3118 | 25.1 | 706 | 2.1 |
| C-ESD | 715 | 7.1 | 31 | 0.4 | 1324 | 6.4 | 82 | 0.7 | 0 | 0.0 |
| Total Household Income | 3606 | 35.7 | 82 | 1.1 | 0 | 0.0 | 273 | 2.2 | 0 | 0.0 |
| **ADL** |  |  |  |  |  |  |  |  |  |  |
| Dressing | 117 | 1.2 | 0 | 0.0 | 16 | 0.1 | 58 | 0.5 | 0 | 0.0 |
| Bathing | 122 | 1.2 | 0 | 0.0 | 14 | 0.1 | 151 | 1.2 | 0 | 0.0 |
| Eating | 155 | 1.1 | 0 | 0.0 | 31 | 0.2 | 153 | 1.2 | 0 | 0.0 |
| Get in/out of bed | 116 | 1.2 | 0 | 0.0 | 25 | 0.1 | 149 | 1.2 | 0 | 0.0 |
| Using the toilet | 117 | 1.2 | 0 | 0.0 | 40 | 0.2 | 162 | 1.3 | 0 | 0.0 |
| **IADL** |  |  |  |  |  |  |  |  |  |  |
| Managing money | 30 | 0.3 | 0 | 0.0 | 594 | 2.9 | 68 | 0.6 | 0 | 0.0 |
| Take medications | 17 | 0.2 | 0 | 0.0 | 286 | 1.4 | 53 | 0.4 | 0 | 0.0 |
| Shop for grocery | 15 | 0.2 | 0 | 0.0 | 378 | 1.8 | 367 | 3.0 | 0 | 0.0 |
| Prepare hot meal | 7 | 0.1 | 0 | 0.0 | 556 | 2.7 | 712 | 5.7 | 0 | 0.0 |
| **Chronic Diseases** |  |  |  |  |  |  |  |  |  |  |
| Arthritis | 27 | 0.3 | 0 | 0.0 | 0 | 0.0 | 349 | 2.8 | 34 | 0.1 |
| Cancer | 55 | 0.6 | 0 | 0.0 | 0 | 0.0 | 342 | 2.8 | 35 | 0.1 |
| Diabetes | 94 | 1.0 | 0 | 0.0 | 0 | 0.0 | 352 | 2.8 | 34 | 0.1 |
| Heart conditions | 61 | 1.0 | 0 | 0.0 | 0 | 0.0 | NA | NA | 32 | 0.1 |
| High blood pressure | 49 | 0.5 | 0 | 0.0 | 0 | 0.0 | 360 | 3.0 | 32 | 0.1 |
| Lung disease | 43 | 0.4 | 0 | 0.0 | 0 | 0.0 | 334 | 2.7 | 36 | 0.1 |
| Stroke | 31 | 0.3 | 0 | 0.0 | 0 | 0.0 | 348 | 2.8 | 36 | 0.1 |

ADL: activities of daily living; IADL: instrumental activities of daily living; HRS: Health and Retirement Study; ELSA: English Longitudinal Study of Ageing; SHARE: Survey of Health, Ageing and Retirement in Europe; CHARLS: China Health and Retirement Longitudinal Study; MHAS: Mexican Health and Aging Study; CES-D: Center for Epidemiologic Studies Depression.

**Supplementary Table S7. Original surveys’ ethical approvals**

| **Cohorts** | **Ethical approval** |
| --- | --- |
| HRS | Authorized by the National Institute on Aging and the Social Security Administration (NIA U01AG009740). |
| CHARLS | Approved by the Peking University Institutional Review Board (IRB00001052-11015). |
| SHARE | Approved by the Max Planck Society’s Ethics Committee. |
| ELSA | Approved by the National Research and Ethics Service Committee South Central - Berkshire. |
| MHAS | Approved by the National Institutes of Health/National Institute on Aging (NIH R01AG018016). |

All participants in these studies provided written informed consent, as stipulated by the original survey documents.

**Supplementary Figure S4. Flowchart of including and excluding process in all cohorts**


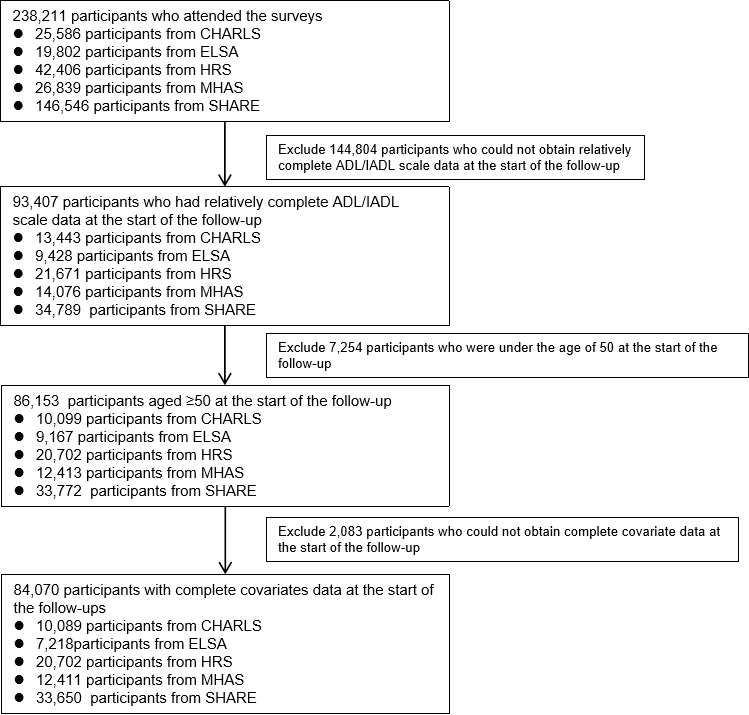


Abbreviations: CHARLS: China Health and Retirement Longitudinal Study; ELSA: English Longitudinal Study of Ageing; HRS: Health and Retirement Study; SHARE: Survey of Health, Ageing and Retirement in Europe; MHAS: Mexican Health and Aging Study. ADL: Activities of Daily Living; IADL: Instrumental Activities of Daily Living.

**Supplementary Figure S5. Meta analysis of** **association between ADL/IADL status and mortality(ADL disability as exposure, model 1 adjusted)**


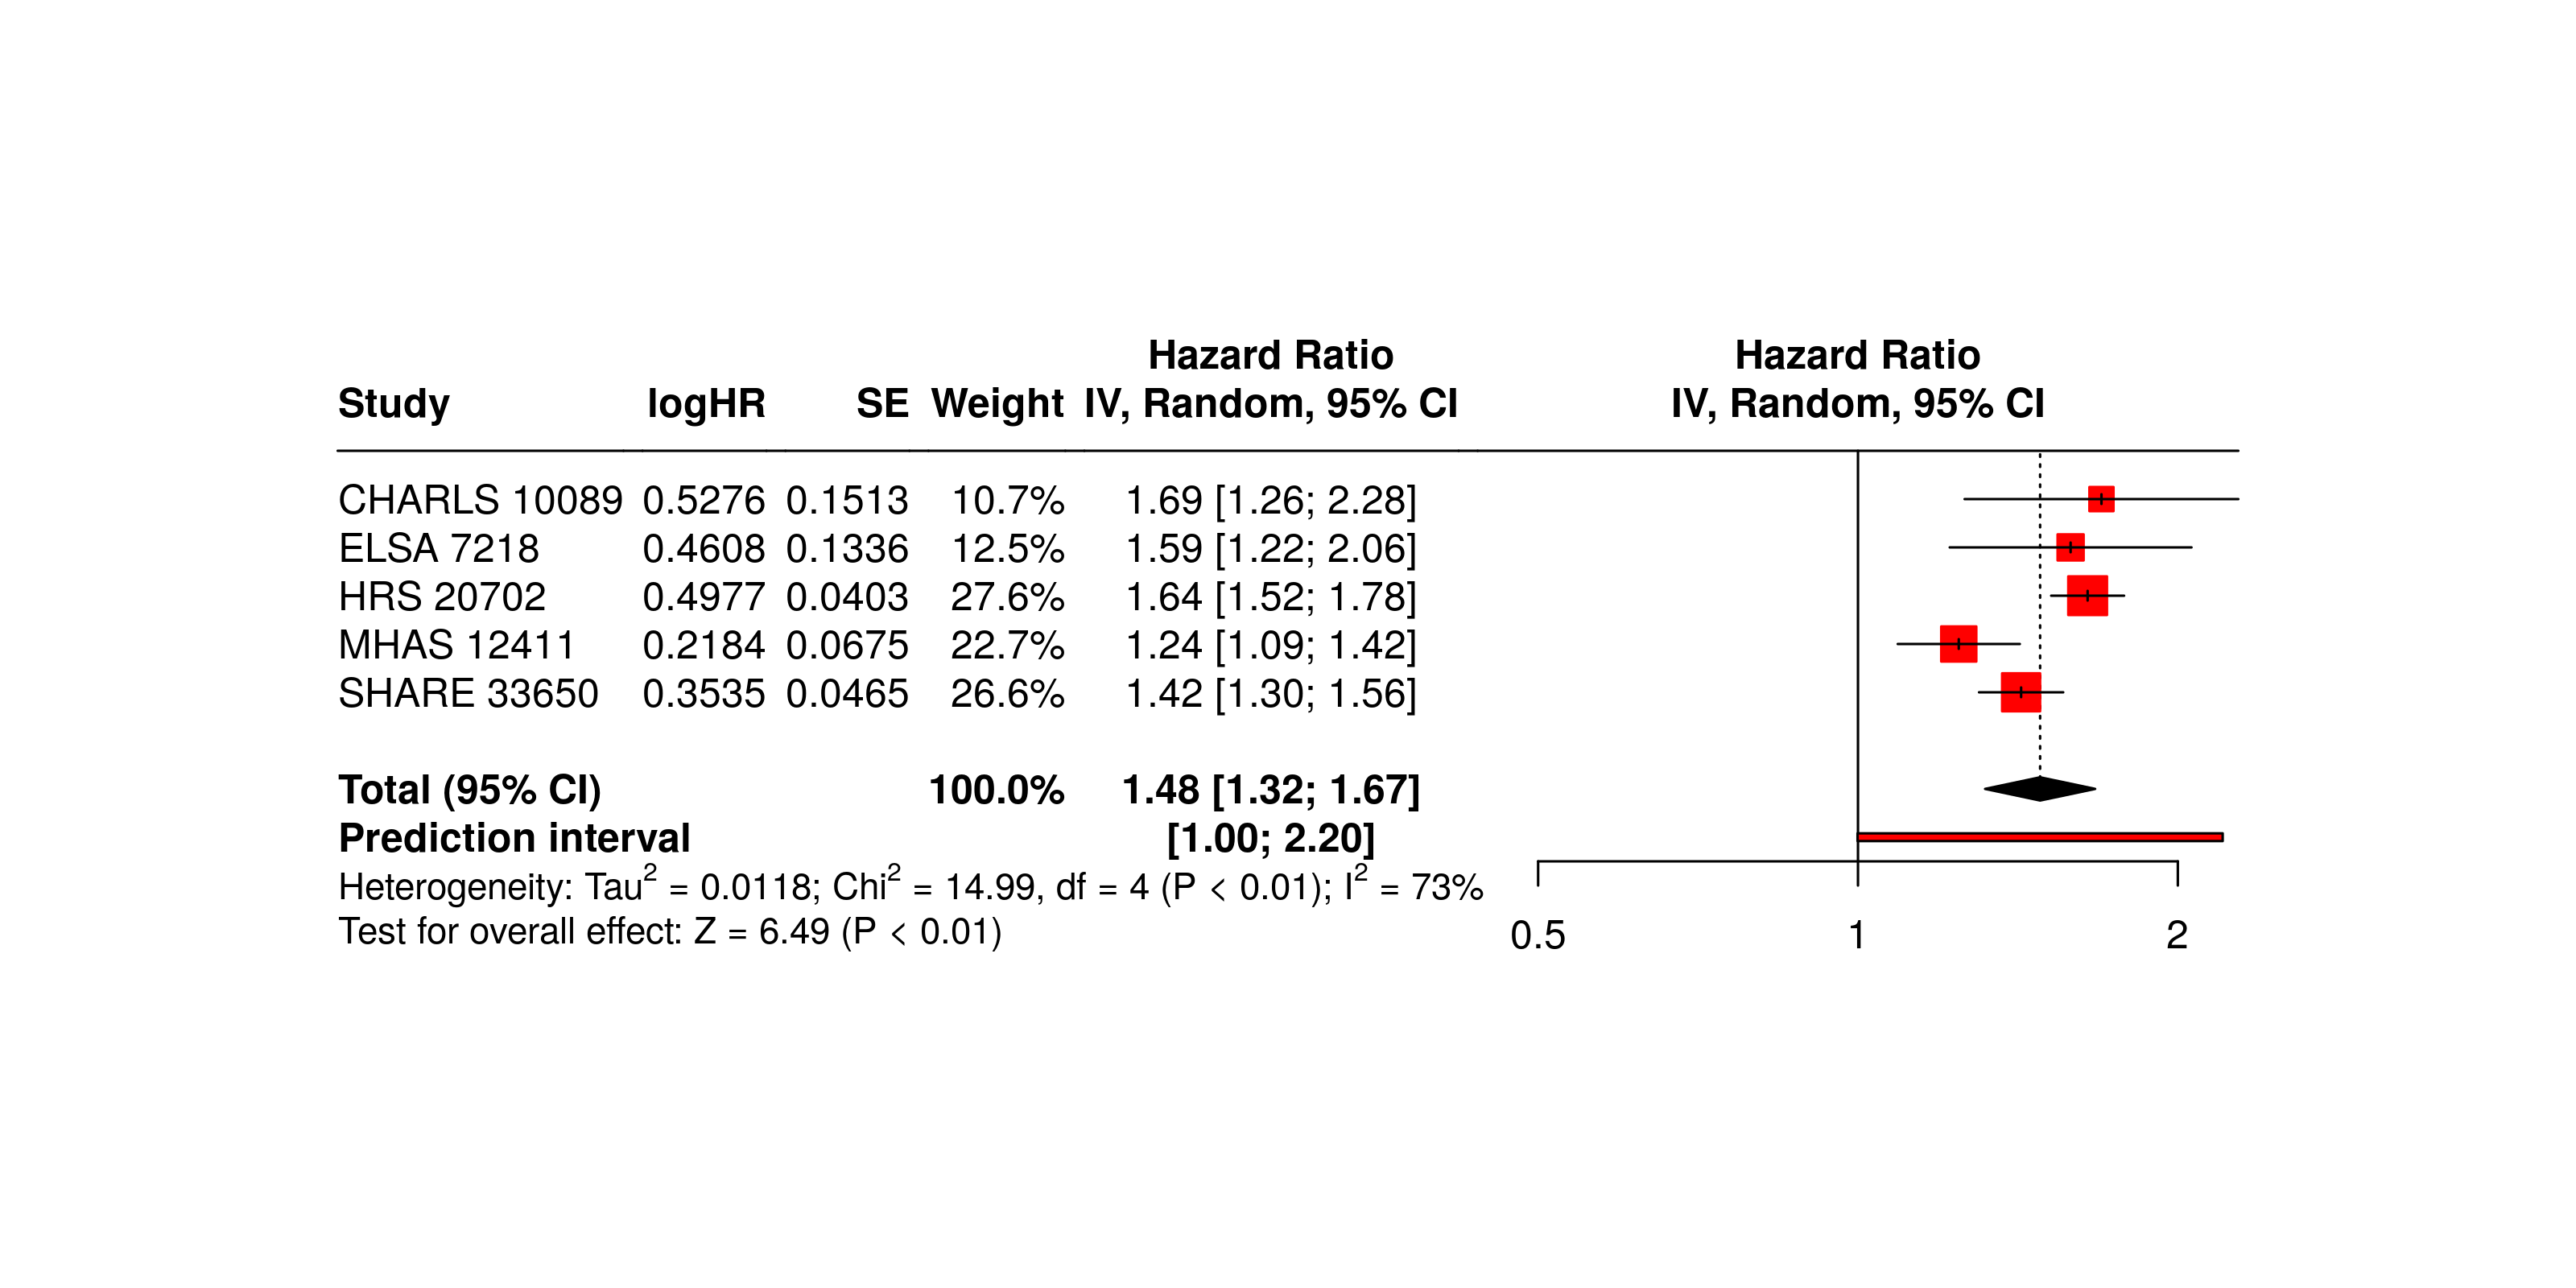

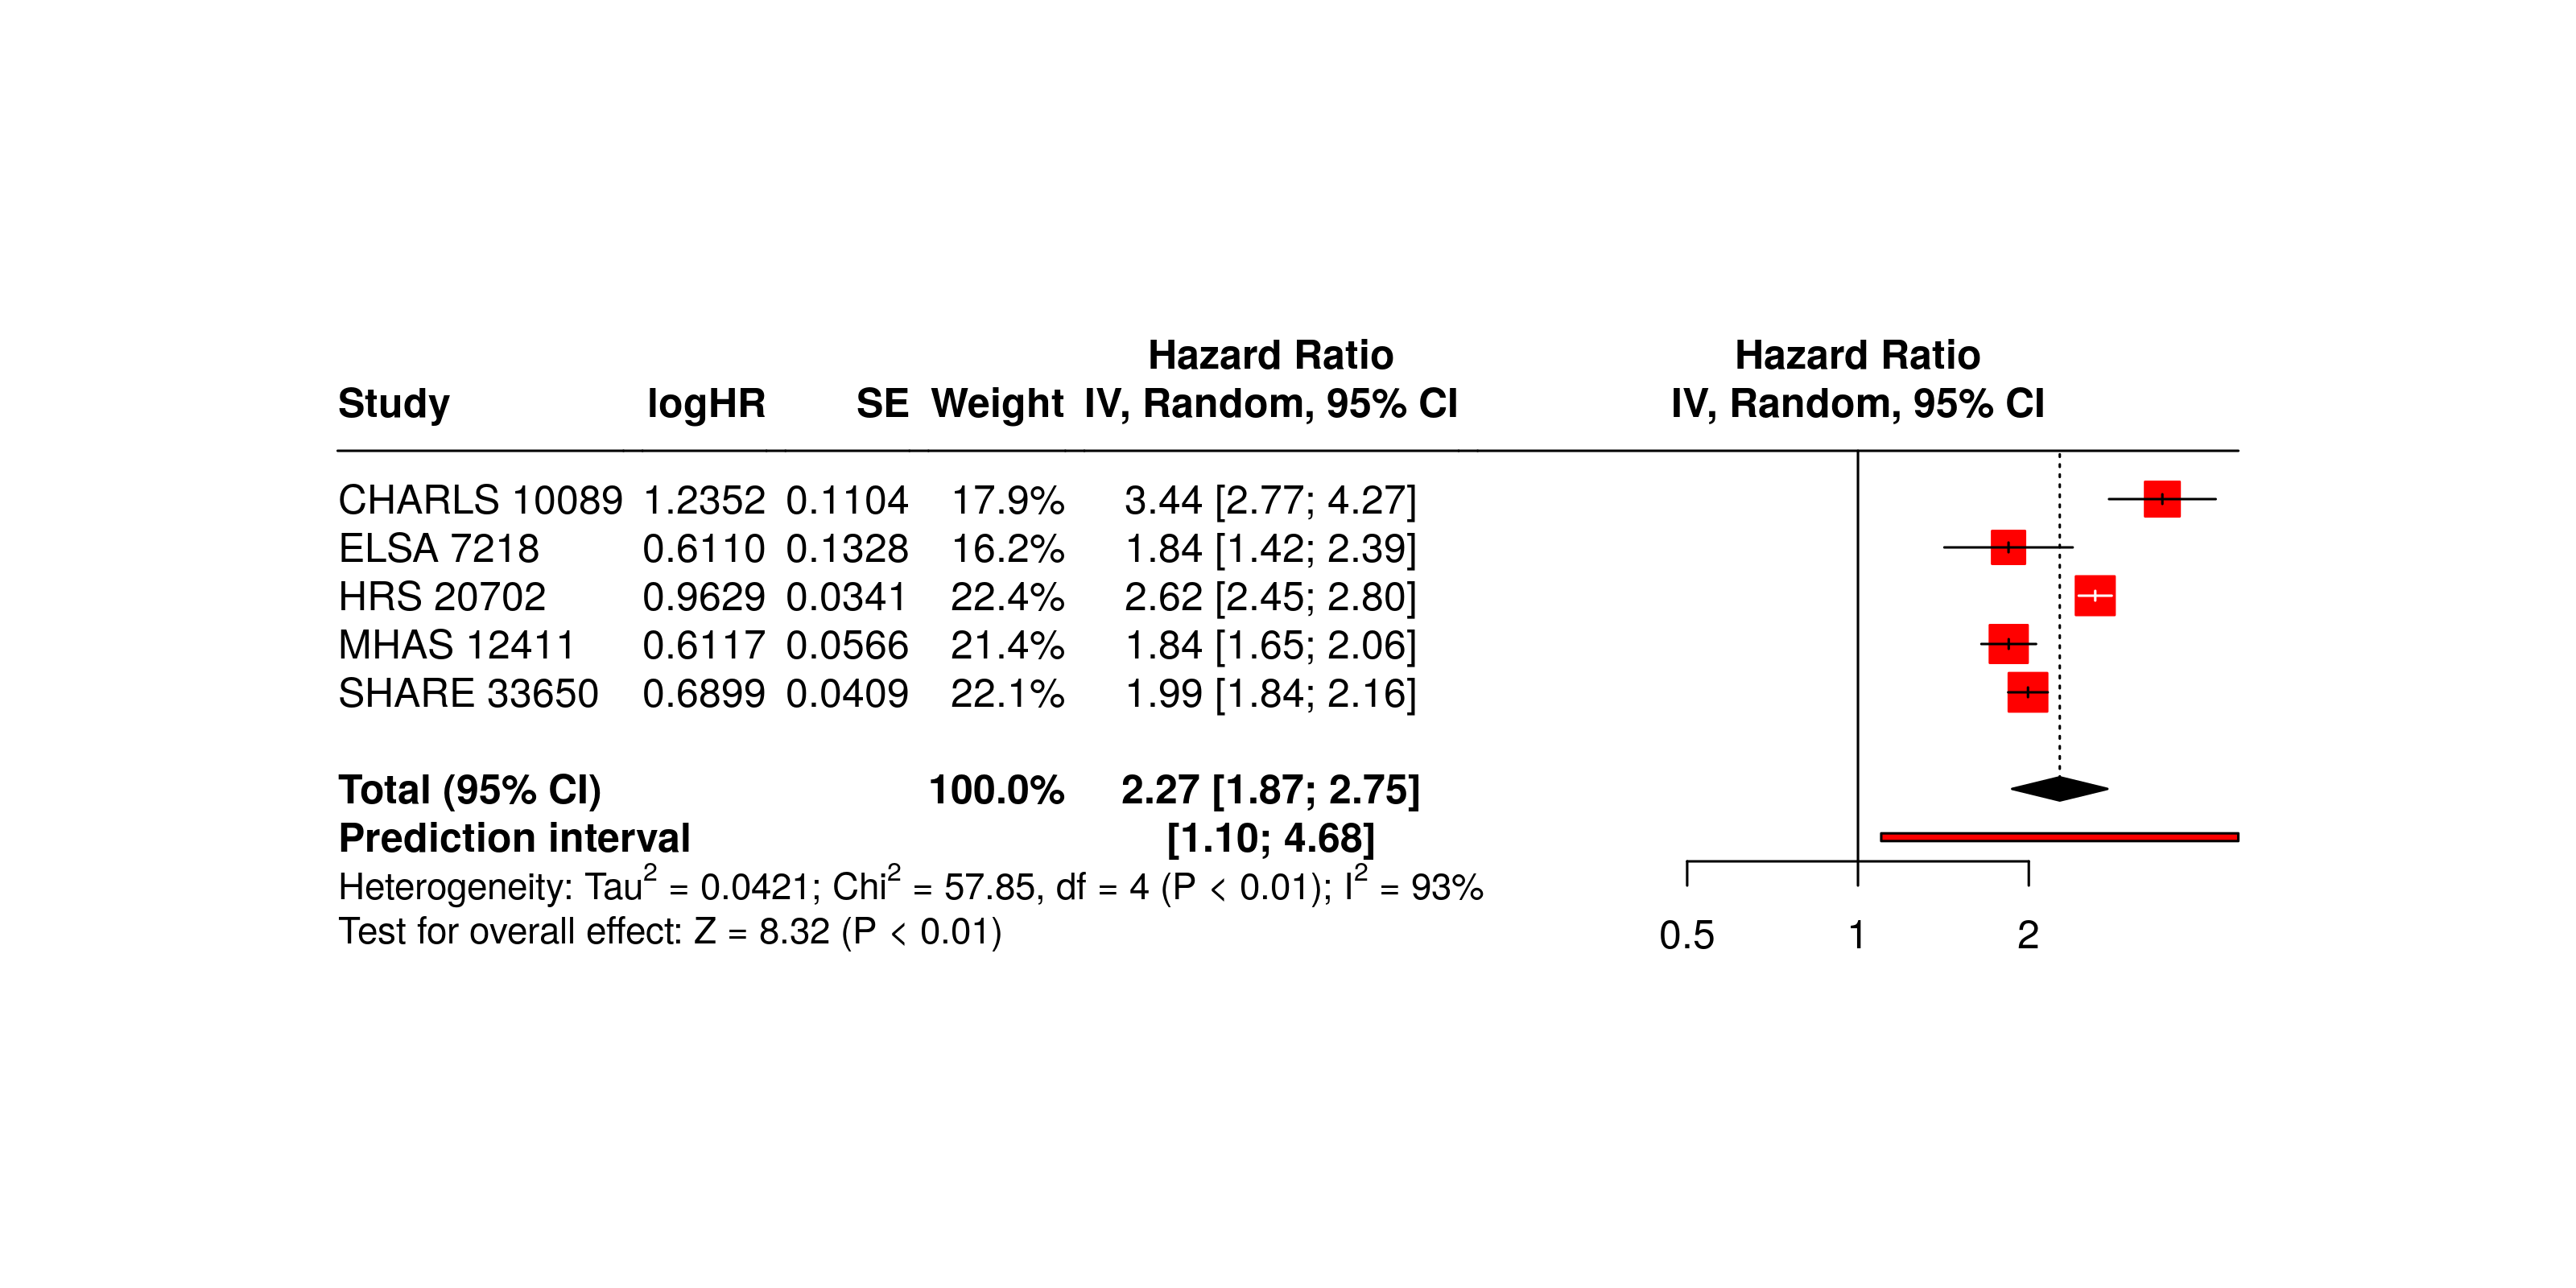


**Exposure: ADL disability = 1**

**(Model 1 adjusted)**

**Exposure: ADL disability >= 2**

**(Model 1 adjusted)**

Model 1 was adjusted for demographic variables (age, gender, region, education, marital status), BMI, smoking, drinking status.

**Supplementary Figure S6. Meta analysis of association between ADL/IADL status and mortality(IADL disability as exposure, model 1 adjusted)**

Model 1 was adjusted for demographic variables (age, gender, region, education, marital status), BMI, smoking, drinking status.


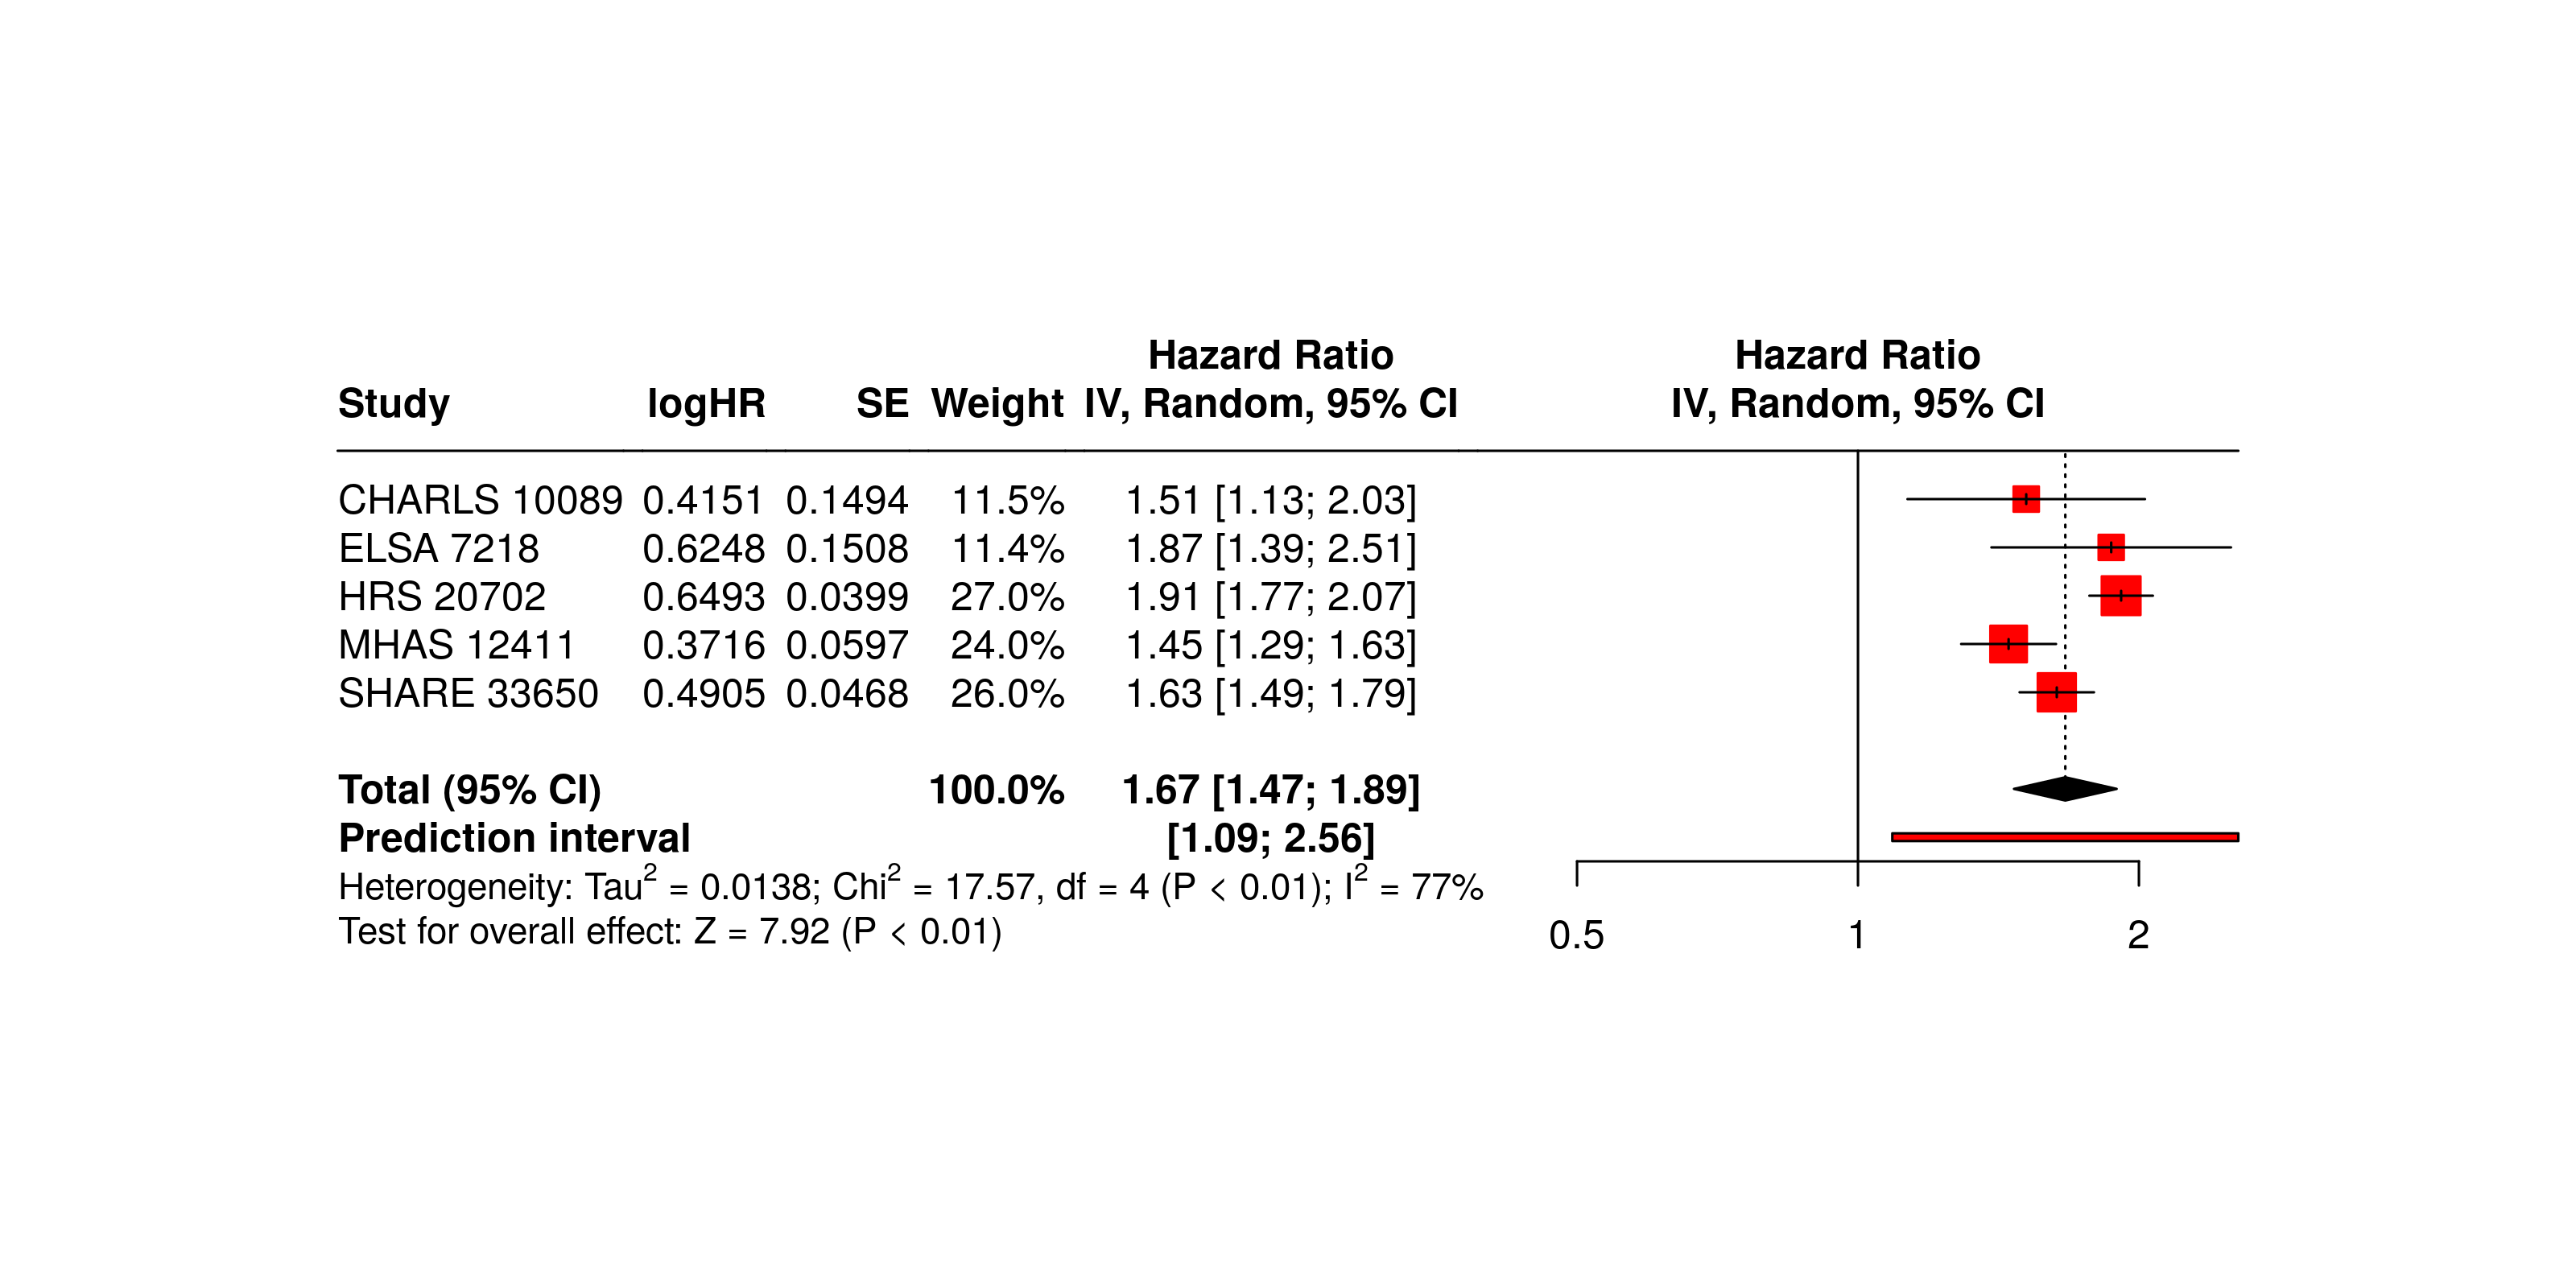

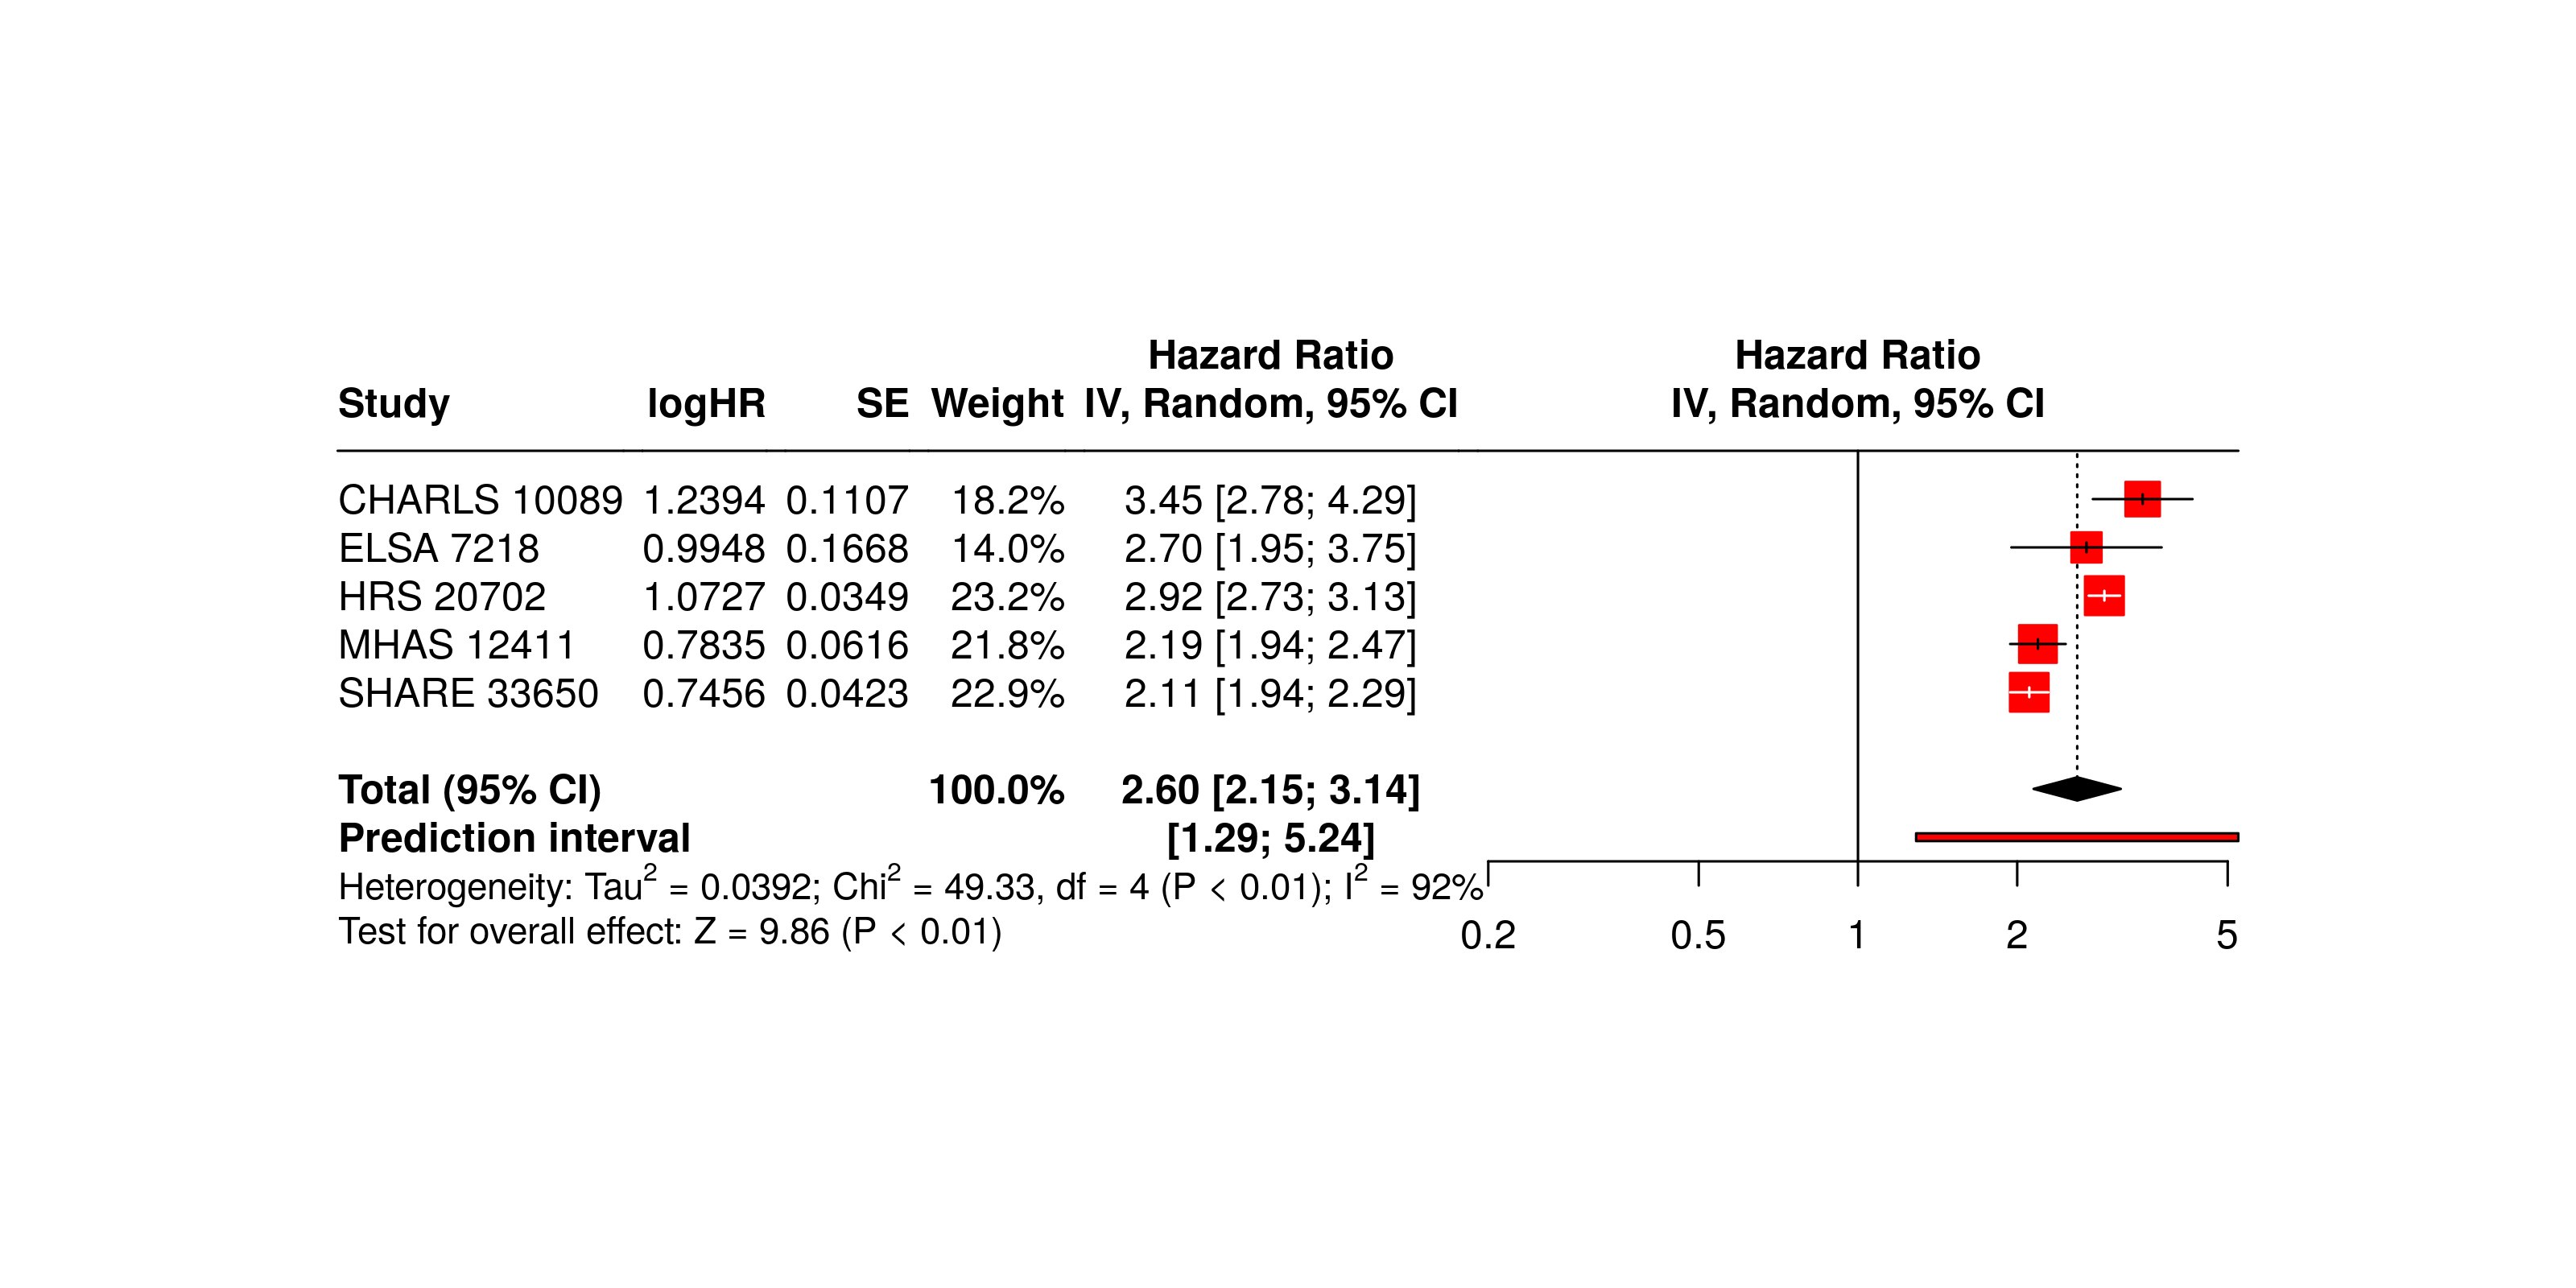


**Exposure: IADL disability = 1**

**(Model 1 adjusted)**

**Exposure: IADL disability >= 2**

**(Model 1 adjusted)**

**Supplementary Figure S7. Meta analysis of association between ADL/IADL status and mortality (ADL disability as exposure, model 2 adjusted)**

Model 2 was adjusted for demographic variables (age, gender, region, education, marital status), BMI, smoking, drinking status, chronic diseases, CES-D scale score, and SES.


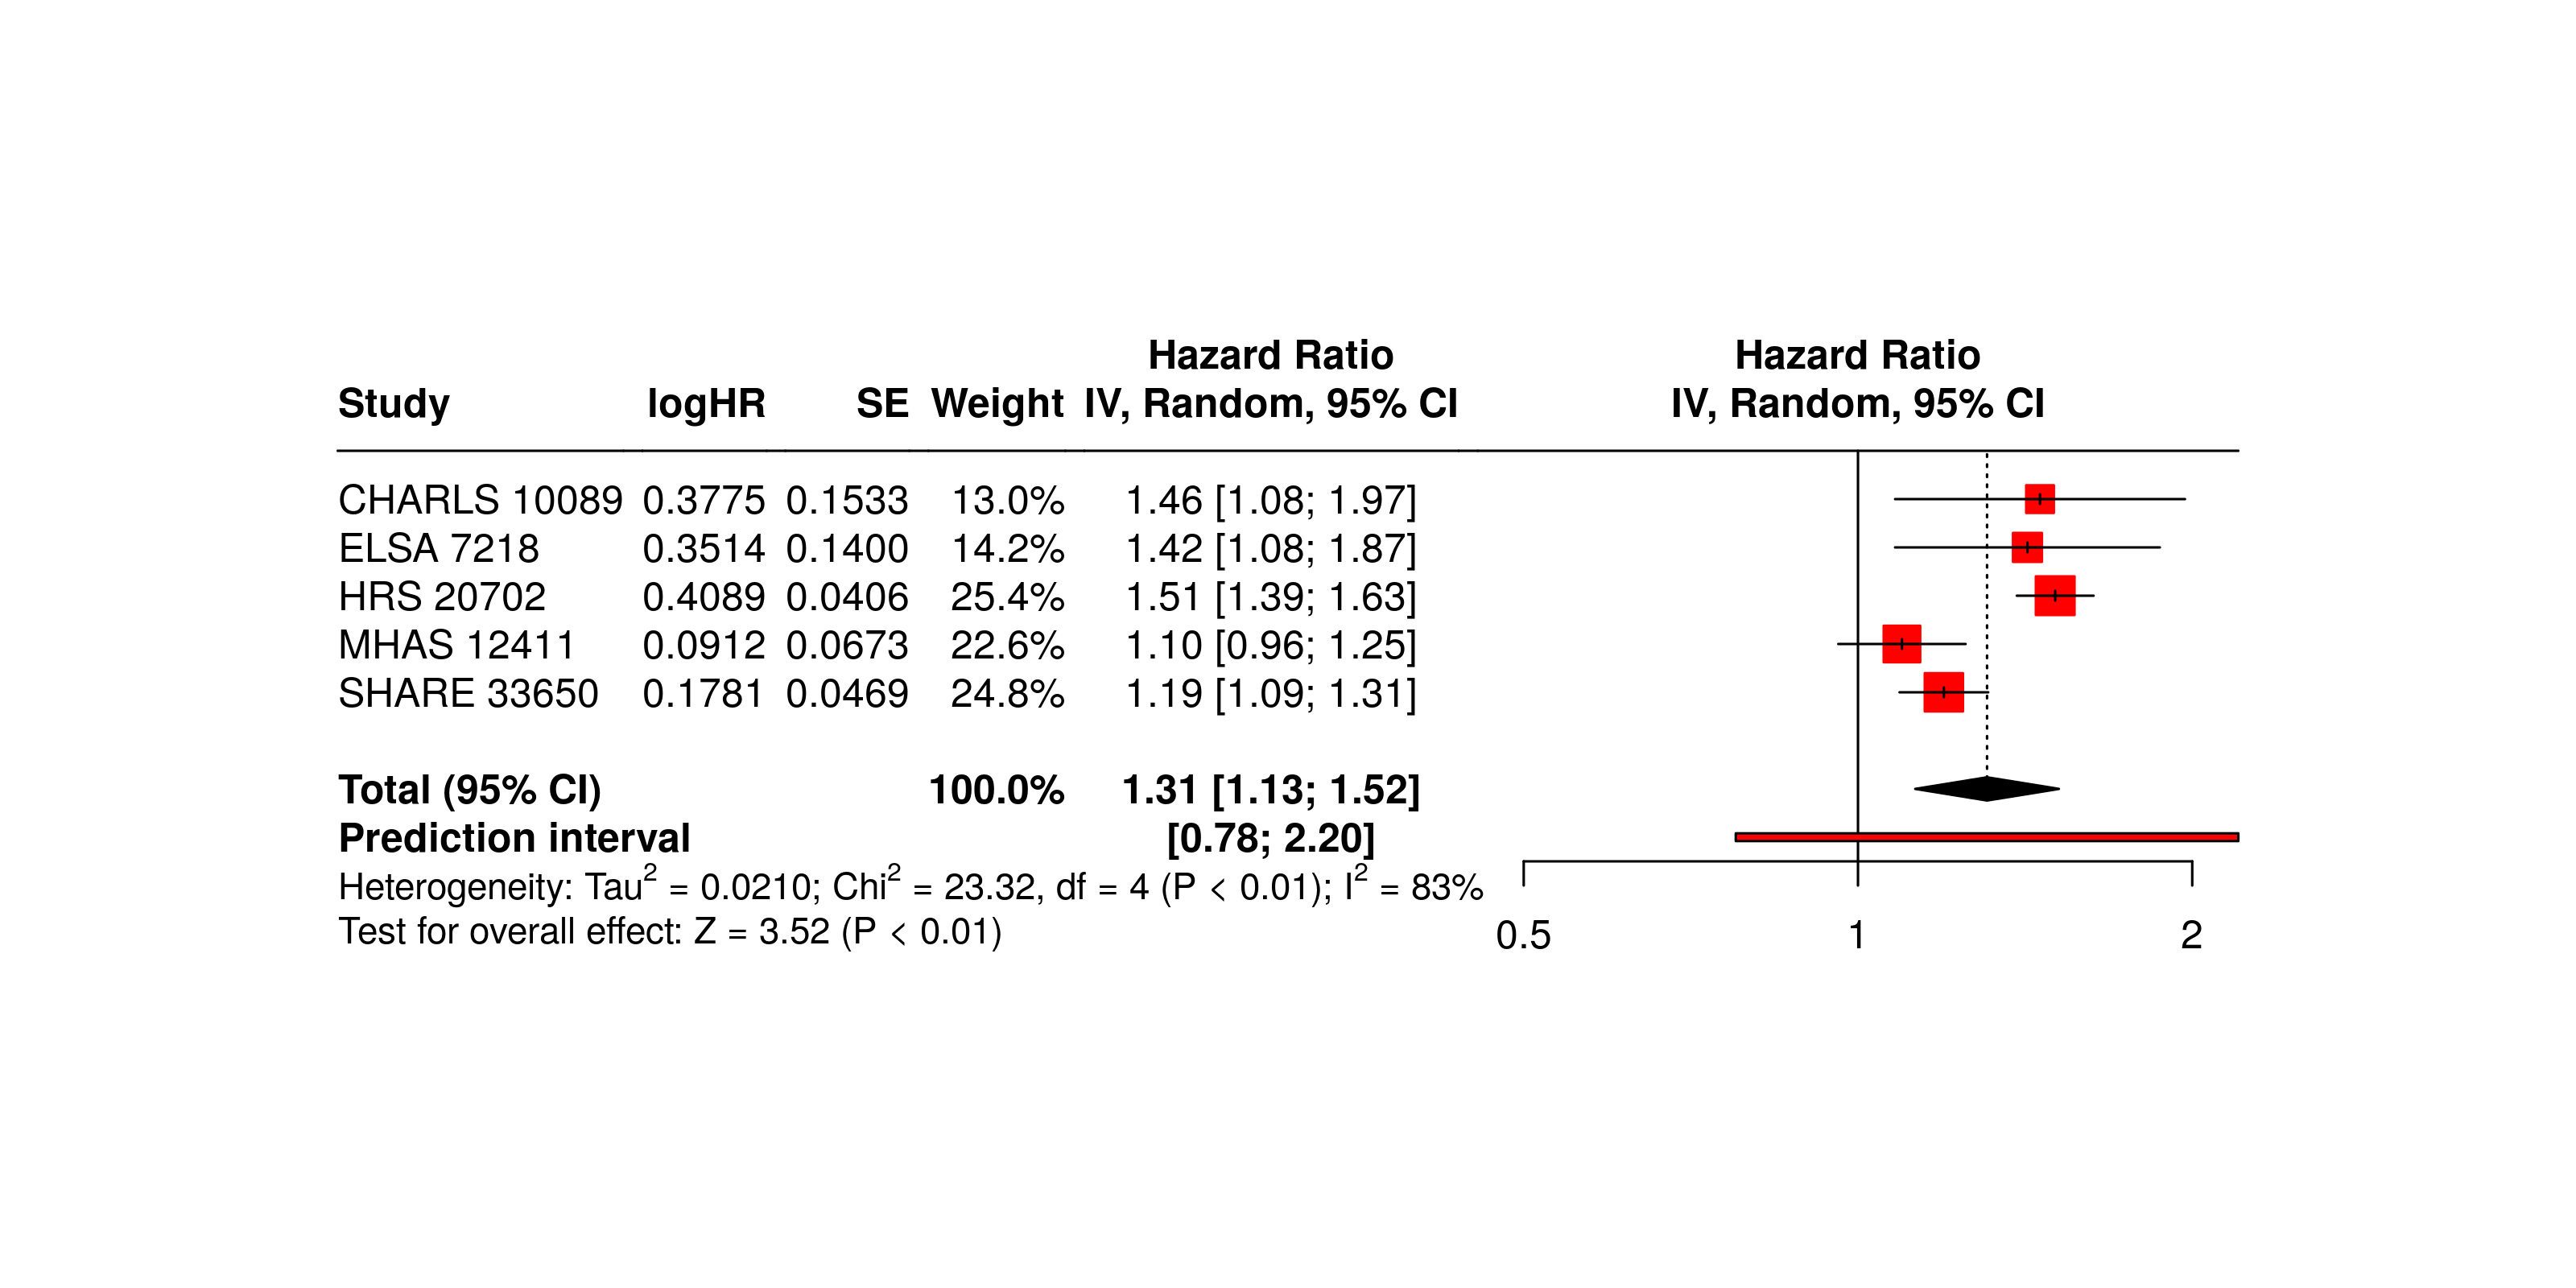

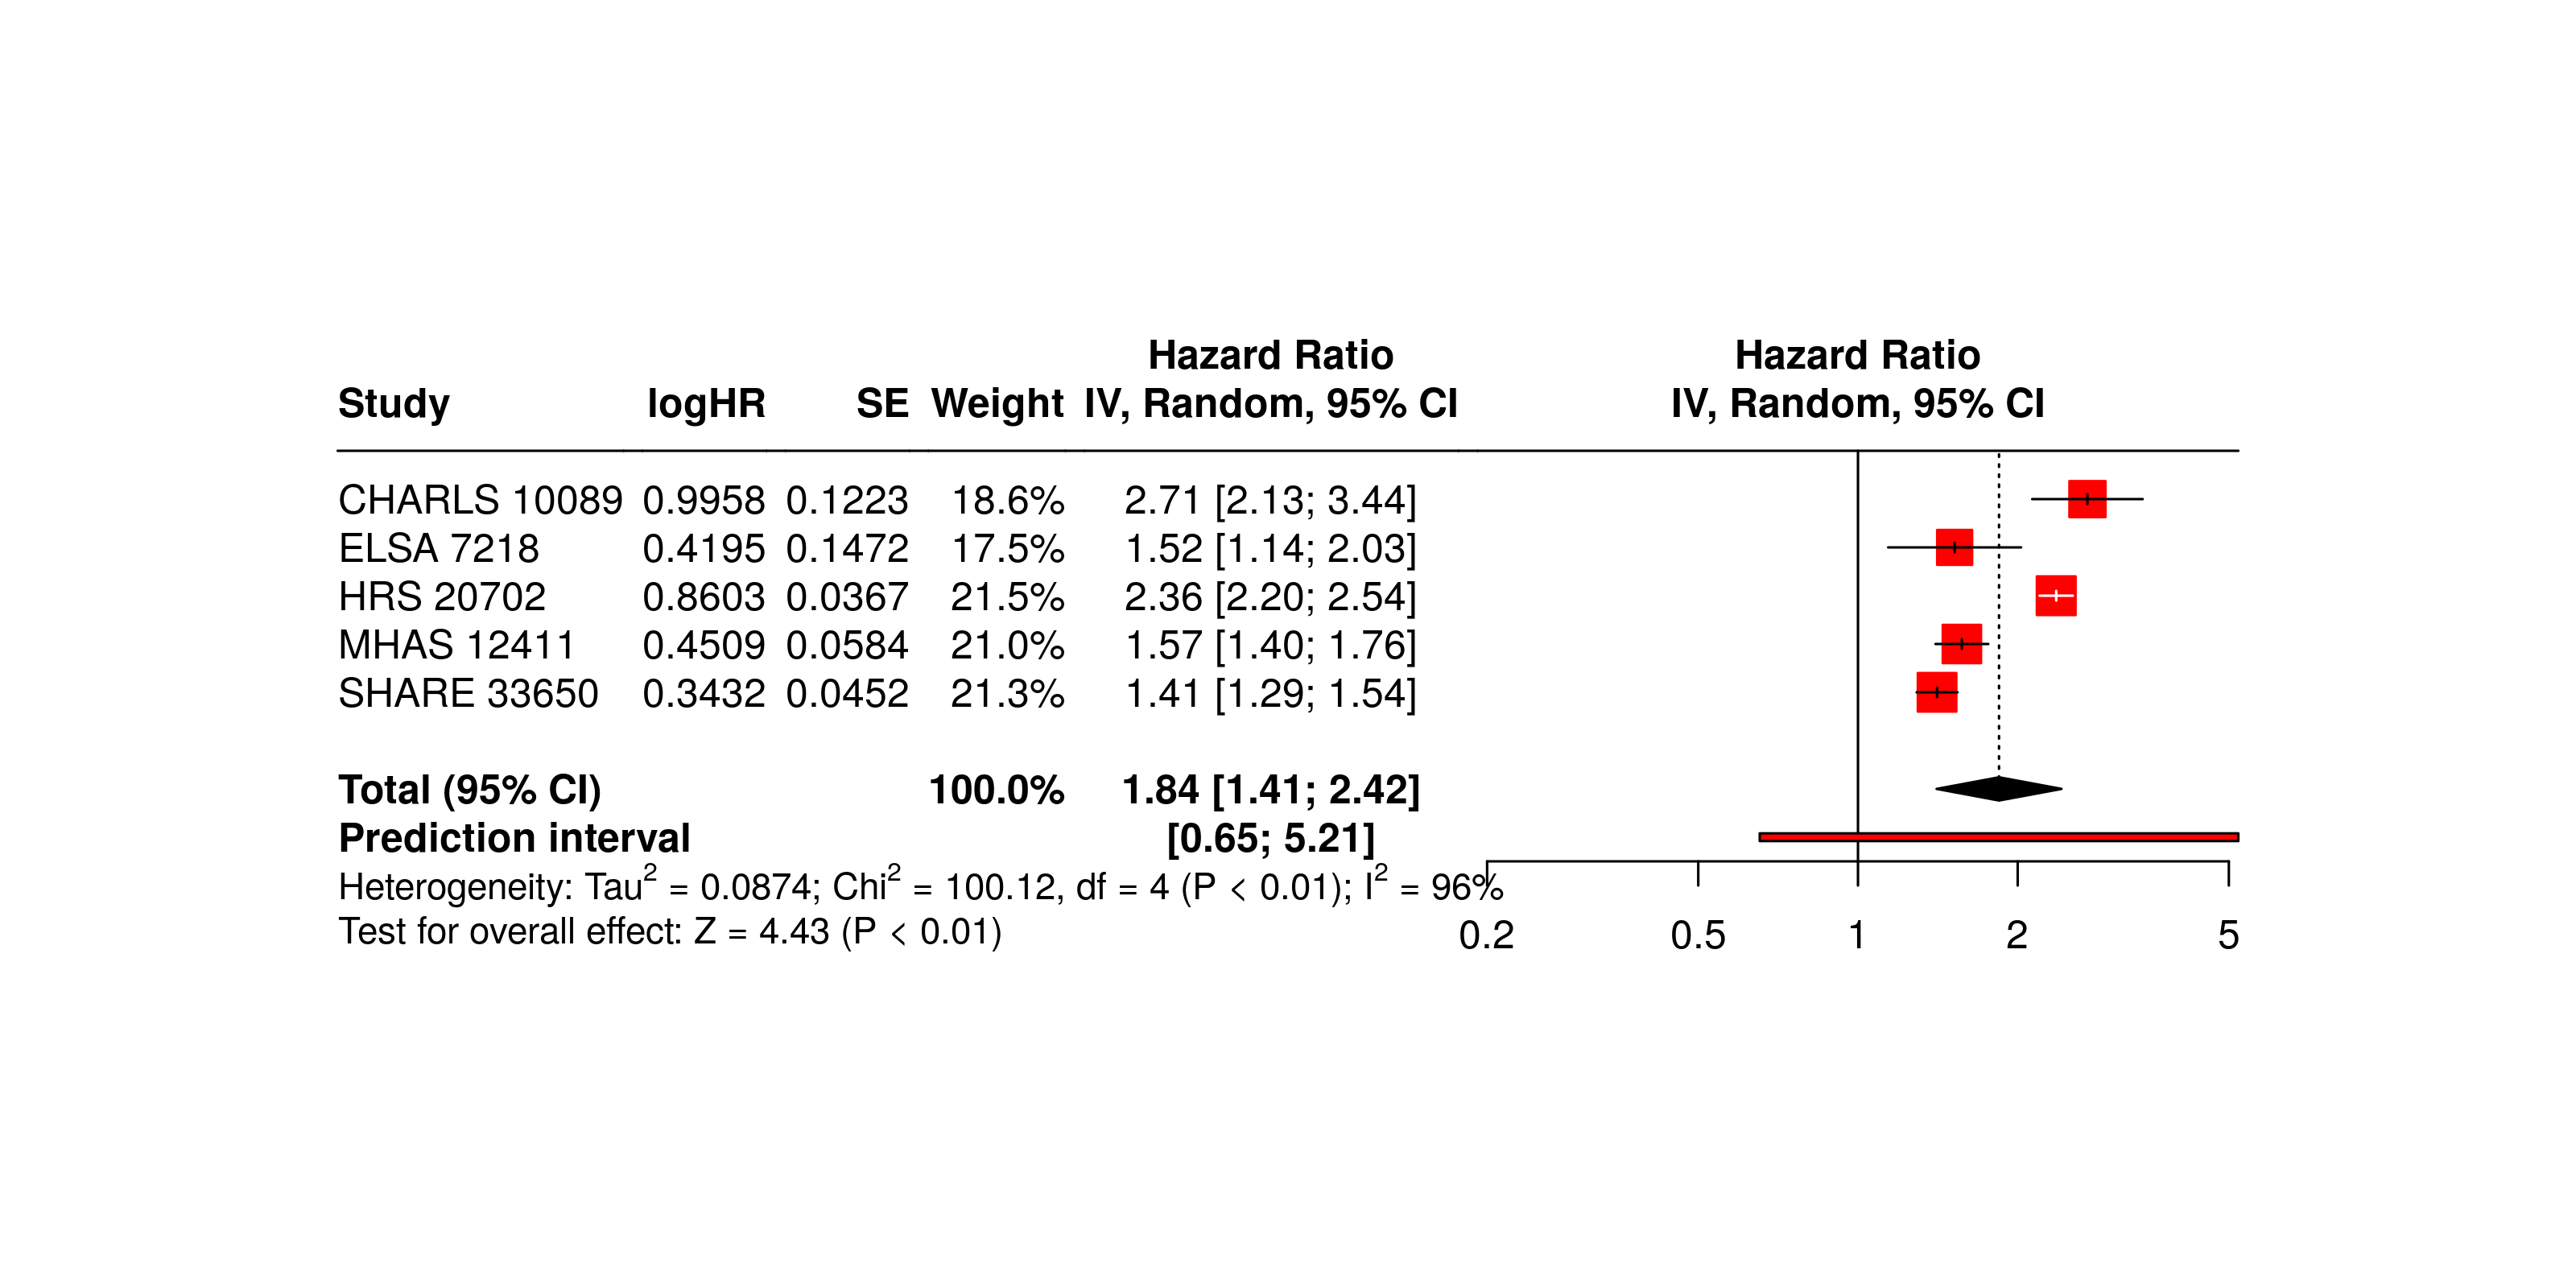


**Exposure: ADL disability = 1**

**(Model 2 adjusted)**

**Exposure: ADL disability >= 2**

**(Model 2 adjusted)**

**Supplementary Figure S8. Meta analysis of association between ADL/IADL status and mortality (IADL disability as exposure, model 2 adjusted)**


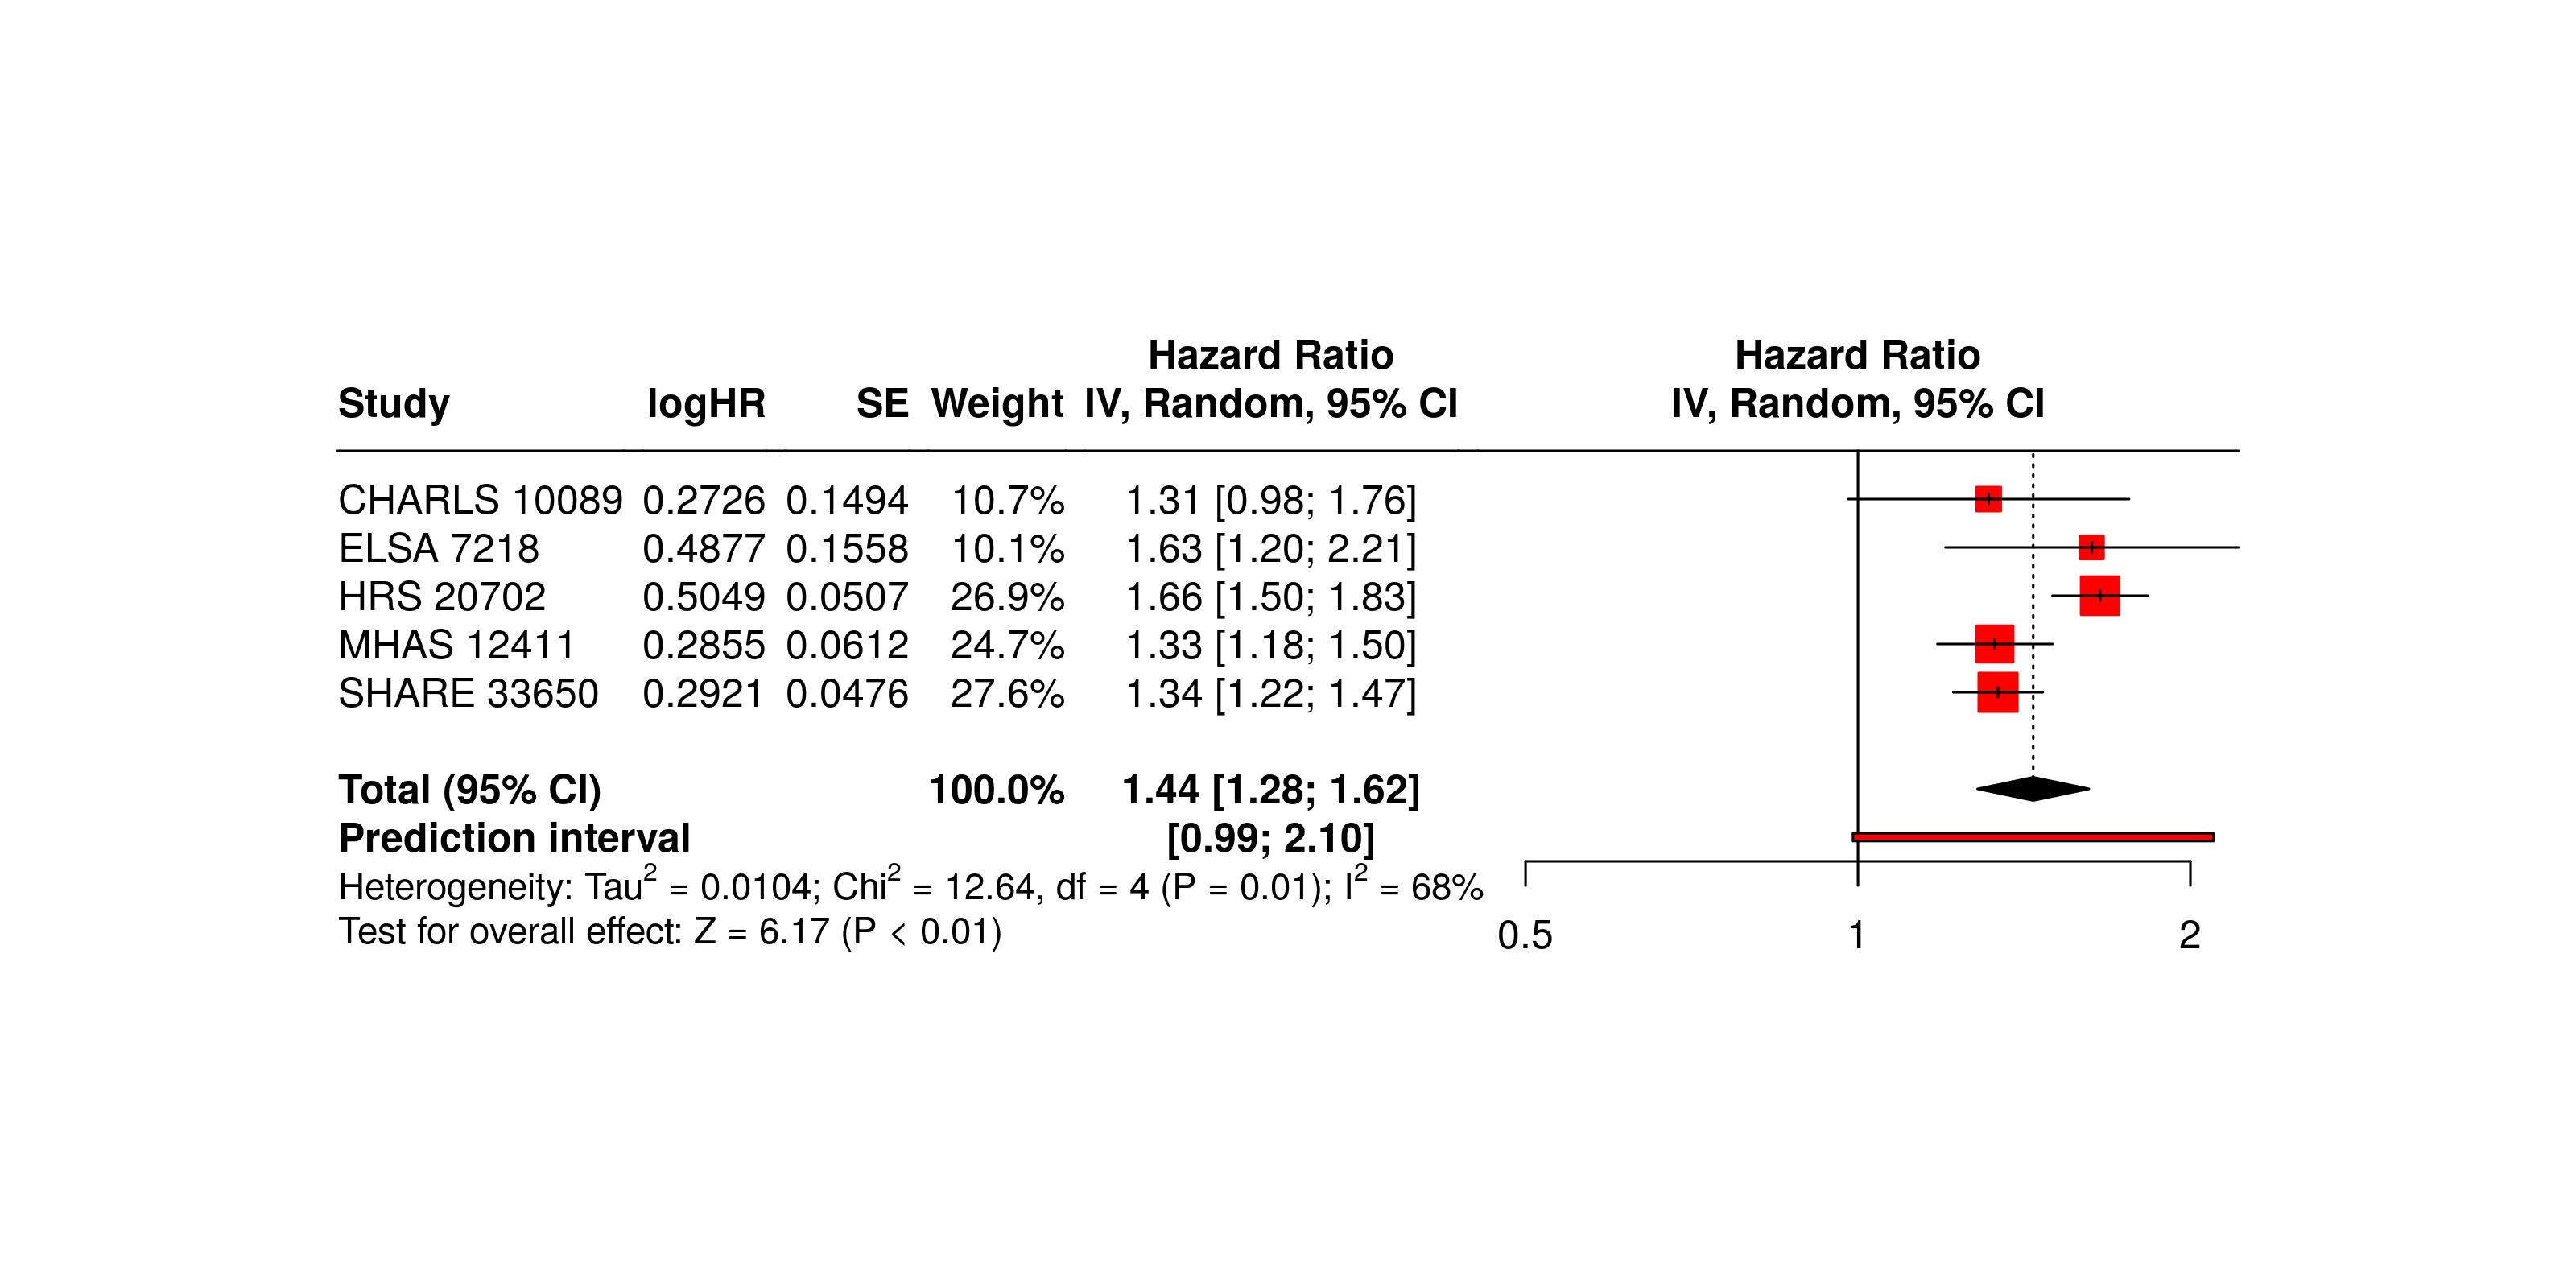

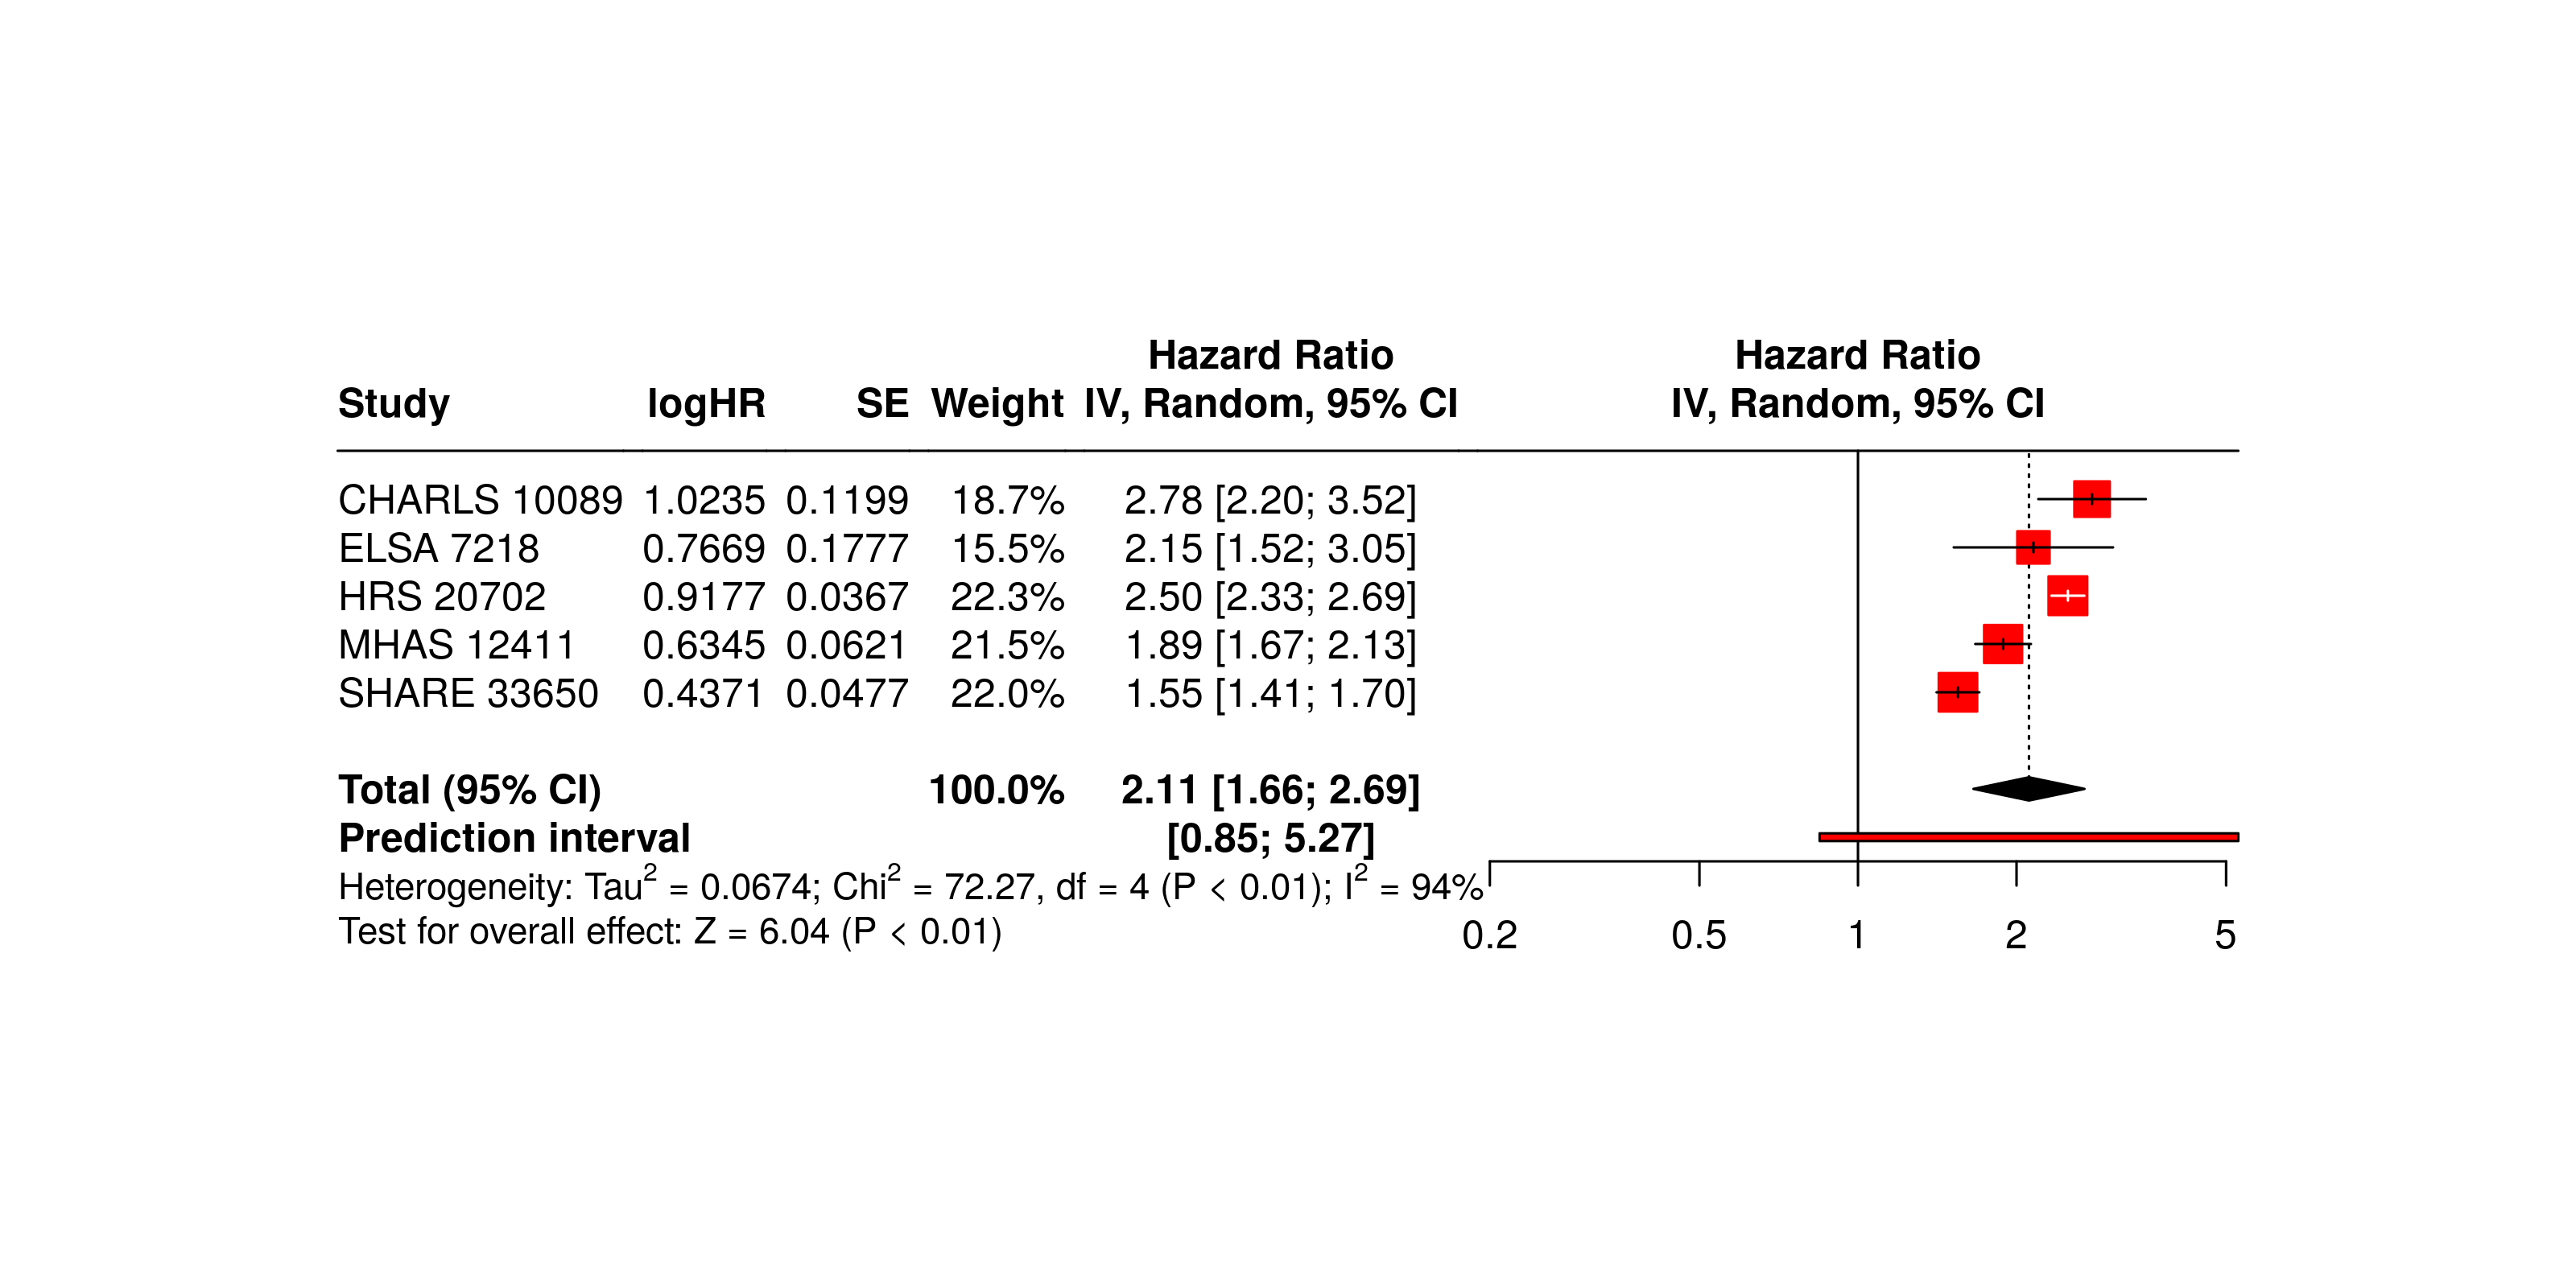


**Exposure: IADL disability = 1**

**(Model 2 adjusted)**

**Exposure: IADL disability >= 2**

**(Model 2 adjusted)**

Model 2 was adjusted for demographic variables (age, gender, region, education, marital status), BMI, smoking, drinking status, chronic diseases, CES-D scale score, and SES.

**Supplementary Table S8. Subgroup analysis - Association between ADL/IADL status and mortality rate in CHARLS**

| **CHARLS** | | **Sex** | | **Age** | | **Region** | | **Education** | | |
| --- | --- | --- | --- | --- | --- | --- | --- | --- | --- | --- |
| Exposure | | Female | Male | <60 | >=60 | Rural | Urban | Less than high school | High school or equivalent | College or above |
| ADL Status  Hazard Ratio (95% Confidence Interval) | Disability items= 0 | ref | ref | ref | ref | ref | ref | ref | ref | ref |
| Disability items= 1 | 1.34 (0.84, 2.11) | 1.52 (1.02, 2.25) | 1.73 (0.76, 3.93) | 1.35 (0.98, 1.86) | 1.51 (1.05,2.17) | 1.25 (0.73,2.15) | 1.39 (1.02, 1.88) | 1.30 (0.24, 7.00) | NA |
| Disability items>= 2 | 2.30 (1.61, 3.29) | 3.02 (2.20, 4.15) | 3.29 (1.66, 6.51) | 2.49 (1.93, 3.22) | 2.64 (1.96,3.55) | 2.71 (1.81,4.06) | 2.67 (2.10, 3.40) | 0.43 (0.04, 4.04) | NA |
| p for interaction | 0.16 | | 0.76 | | 0.75 | | 0.80 | | |
| IADL Status  Hazard Ratio (95% Confidence Interval) | Disability items= 0 | ref | ref | ref | ref | ref | ref | ref | ref | ref |
| Disability items= 1 | 1.38 (0.89, 2.14) | 1.21 (0.81, 1.80) | 2.73 (1.44, 5.16) | 1.09 (0.78, 1.52) | 1.11 (0.77, 1.61) | 1.64 (0.99, 2.71) | 1.27 (0.94, 1.71) | 1.74 (0.34, 8.85) | NA |
| Disability items>= 2 | 2.57 (1.82, 3.63) | 2.93 (2.13, 4.04) | 2.20 (1.01, 4.79) | 2.66 (2.08, 3.42) | 2.37 (1.77, 3.18) | 3.64 (2.44, 5.41) | 2.76 (2.18, 3.49) | 1.89 (0.36, 9.97) | NA |
| p for interaction | 0.48 | | 0.041 | | 0.50 | | 0.73 | | |

Abbreviations: CHARLS: China Health and Retirement Longitudinal Study; ADL: Activities of Daily Living; IADL: Instrumental Activities of Daily Living; NA, not applicable.

All model was adjusted for demographic variables (age, gender, region, education, marital status), BMI, smoking, and drinking status, chronic diseases, CES-D scale score, and SES

**Supplementary Table S9. Subgroup analysis - Association between ADL/IADL status and mortality rate in ELSA**

| ELSA | | Sex | | Age | | Education | | |
| --- | --- | --- | --- | --- | --- | --- | --- | --- |
| Exposure | | Female | Male | <60 | >=60 | Less than high school | High school or equivalent | College or above |
| ADL Status  Hazard Ratio (95% Confidence Interval) | Disability items= 0 | ref | ref | ref | ref | ref | ref | ref |
| Disability items= 1 | 1.41 (0.94, 2.13) | 1.38 (0.95, 1.99) | 1.79 (0.57, 5.57) | 1.36 (1.03, 1.81) | 1.37 (0.94, 2.00) | 1.19 (0.74, 1.89) | 2.73 (1.25, 5.94) |
| Disability items>= 2 | 1.45 (0.92, 2.29) | 1.43 (0.98, 2.08) | 5.48 (2.40, 12.54) | 1.22 (0.89, 1.66) | 1.35 (0.93, 1.97) | 1.87 (1.13, 3.08) | 0.61 (0.16, 2.30) |
| p for interaction | 0.98 | | 0.0034 | | 0.17 | | |
| IADL Status  Hazard Ratio (95% Confidence Interval) | Disability items= 0 | ref | ref | ref | ref | ref | ref | ref |
| Disability items= 1 | 1.63 (1.04, 2.56) | 1.57 (1.03, 2.41) | 3.79 (1.38, 10.40) | 1.41 (1.02, 1.96) | 1.45 (0.99, 2.12) | 2.01 (1.15, 3.54) | 0.97 (0.26, 3.67) |
| Disability items>= 2 | 2.51 (1.55, 4.05) | 1.58 (0.91, 2.72) | 5.50 (1.91, 15.80) | 1.74 (1.20, 2.54) | 1.73 (1.10, 2.74) | 3.20 (1.77, 5.79) | 1.71 (0.35, 8.21) |
| p for interaction | 0.62 | | 0.071 | | 0.61 | | |

Abbreviations: ELSA: English Longitudinal Study of Ageing; ADL: Activities of Daily Living; IADL: Instrumental Activities of Daily Living

All model was adjusted for demographic variables (age, gender, region, education, marital status), BMI, smoking, and drinking status, chronic diseases, CES-D scale score, and SES.

**Supplementary Table S10. Subgroup analysis - Association between ADL/IADL status and mortality rate in HRS**

| HRS | | Sex | | Age | | Region | | Education | | |
| --- | --- | --- | --- | --- | --- | --- | --- | --- | --- | --- |
| Exposure | | Female | Male | <60 | >=60 | Rural | Urban | Less than high school | High school or equivalent | College or above |
| ADL Status  Hazard Ratio (95% Confidence Interval) | Disability items= 0 | ref | ref | ref | ref | ref | ref | ref | ref | ref |
| Disability items= 1 | 1.40 (1.26, 1.56) | 1.42 (1.26, 1.61) | 1.16 (0.90, 1.50) | 1.42 (1.30, 1.55) | 1.44 (1.25, 1.65) | 1.40 (1.27,1.55) | 1.29 (1.10, 1.50) | 1.40 (1.23,1.60) | 1.50 (1.31, 1.73) |
| Disability items>= 2 | 2.16 (1.96, 2.37) | 2.09 (1.86, 2.35) | 1.11 (0.86, 1.42) | 2.25 (2.08, 2.43) | 2.38 (2.08, 2.71) | 2.04 (1.86,2.22) | 1.80 (1.58, 2.04) | 2.33 (2.06,2.63) | 2.47 (2.18, 2.82) |
| p for interaction | 0.97 | | 0.11 | | 0.28 | | < 0.0001 | | |
| IADL Status  Hazard Ratio (95% Confidence Interval) | Disability items= 0 | ref | ref | ref | ref | ref | ref | ref | ref | ref |
| Disability items= 1 | 1.75 (1.58, 1.95) | 1.45 (1.29, 1.63) | 1.11 (0.86, 1.42) | 1.64 (1.51, 1.79) | 1.58 (1.38, 1.82) | 1.62 (1.47, 1.78) | 1.37 (1.19, 1.58) | 1.77 (1.56, 2.01) | 1.65 (1.44, 1.89) |
| Disability items>= 2 | 2.41 (2.19, 2.65) | 2.07 (1.84, 2.33) | 1.55 (1.19, 2.01) | 2.31 (2.14, 2.49) | 2.22 (1.95, 2.52) | 2.28 (2.09, 2.50) | 2.13 (1.88, 2.42) | 2.26 (1.99, 2.56) | 2.52 (2.22, 2.87) |
| p for interaction | 0.18 | | 0.58 | | 0.67 | | < 0.0001 | | |

Abbreviations: HRS: Health and Retirement Study; ADL: Activities of Daily Living; IADL: Instrumental Activities of Daily Living

All model was adjusted for demographic variables (age, gender, region, education, marital status), BMI, smoking, and drinking status, chronic diseases, CES-D scale score, and SES.

**Supplementary Table S11. Subgroup analysis - Association between ADL/IADL status and mortality rate in MHAS**

| MHAS | | Sex | | Age | | Region | | Education | | |
| --- | --- | --- | --- | --- | --- | --- | --- | --- | --- | --- |
| Exposure | | Female | Male | <60 | >=60 | Rural | Urban | Less than high school | High school or equivalent | College or above |
| ADL Status  Hazard Ratio (95% Confidence Interval) | Disability items= 0 | ref | ref | ref | ref | ref | ref | ref | ref | ref |
| Disability items= 1 | 1.04 (0.87, 1.25) | 1.17 (0.96, 1.42) | 0.94 (0.66, 1.35) | 1.14 (0.99, 1.32) | 1.16 (0.91, 1.48) | 1.07 (0.92, 1.26) | 1.12 (0.98, 1.28) | 0.61 (0.12, 3.06) | 0.71 (0.28, 1.80) |
| Disability items>= 2 | 1.43 (1.23, 1.68) | 1.74 (1.47, 2.07) | 1.73 (1.29, 2.32) | 1.56 (1.37, 1.77) | 1.63 (1.31, 2.03) | 1.54 (1.35, 1.76) | 1.56 (1.39, 1.75) | NA | 1.82 (1.02, 3.24) |
| p for interaction | 0.27 | | 0.28 | | 0.62 | | 0.085 | | |
| IADL Status  Hazard Ratio (95% Confidence Interval) | Disability items= 0 | ref | ref | ref | ref | ref | ref | ref | ref | ref |
| Disability items= 1 | 1.44 (1.22, 1.69) | 1.25 (1.05, 1.48) | 1.51 (1.12, 2.03) | 1.32 (1.16, 1.50) | 1.28 (1.03, 1.60) | 1.35 (1.17, 1.55) | 1.32 (1.17, 1.49) | 1.13 (0.31, 4.07) | 2.19 (1.18, 4.04) |
| Disability items>= 2 | 1.89 (1.61, 2.22) | 1.94 (1.60, 2.35) | 2.17 (1.46, 3.22) | 1.92 (1.69, 2.19) | 2.14 (1.70, 2.70) | 1.83 (1.58, 2.11) | 1.90 (1.68, 2.16) | NA | 1.45 (0.75, 2.77) |
| p for interaction | 0.44 | | 0.21 | | 0.30 | | 0.25 | | |

Abbreviations: MHAS: Mexican Health and Aging Study; ADL: Activities of Daily Living; IADL: Instrumental Activities of Daily Living

All model was adjusted for demographic variables (age, gender, region, education, marital status), BMI, smoking, and drinking status, chronic diseases, CES-D scale score, and SES.

**Supplementary Table S12. Subgroup analysis - Association between ADL/IADL status and mortality rate in SHARE**

| SHARE | | Sex | | Age | | Region | | Education | | |
| --- | --- | --- | --- | --- | --- | --- | --- | --- | --- | --- |
| Exposure | | Female | Male | <60 | >=60 | Rural | Urban | Less than high school | High school or equivalent | College or above |
| ADL Status  Hazard Ratio (95% Confidence Interval) | Disability items= 0 | ref | ref | ref | ref | ref | ref | ref | ref | ref |
| Disability items= 1 | 1.29 (1.13, 1.46) | 1.08 (0.94, 1.24) | 1.27 (0.85, 1.91) | 1.19 (1.08, 1.31) | 1.19 (1.00, 1.42) | 1.19 (1.06, 1.33) | 1.21 (1.08, 1.35) | 1.11 (0.90, 1.36) | 1.27 (0.93, 1.72) |
| Disability items>= 2 | 1.47 (1.30, 1.66) | 1.21 (1.05, 1.39) | 2.07 (1.41, 3.03) | 1.36 (1.24, 1.50) | 1.45 (1.23, 1.71) | 1.32 (1.18, 1.48) | 1.35 (1.21, 1.50) | 1.32 (1.07, 1.63) | 1.53 (1.14, 2.05) |
| p for interaction | 0.010 | | < 0.0001 | | 0.62 | | 0.26 | | |
| IADL Status  Hazard Ratio (95% Confidence Interval) | Disability items= 0 | ref | ref | ref | ref | ref | ref | ref | ref | ref |
| Disability items= 1 | 1.32 (1.16, 1.50) | 1.36 (1.18, 1.56) | 1.44 (0.91, 2.27) | 1.34 (1.22, 1.48) | 1.48 (1.24, 1.75) | 1.29 (1.16, 1.45) | 1.36 (1.22, 1.52) | 1.24 (1.00, 1.53) | 1.31 (0.97, 1.78) |
| Disability items>= 2 | 1.53 (1.35, 1.74) | 1.43 (1.24, 1.65) | 3.05 (1.98, 4.69) | 1.52 (1.38, 1.67) | 1.42 (1.20, 1.69) | 1.55 (1.39, 1.74) | 1.52 (1.36, 1.70) | 1.48 (1.19, 1.84) | 1.51 (1.09, 2.10) |
| p for interaction | 0.33 | | < 0.0001 | | 0.23 | | 0.61 | | |

Abbreviations: SHARE: Survey of Health, Ageing and Retirement in Europe; ADL: Activities of Daily Living; IADL: Instrumental Activities of Daily Living

All model was adjusted for demographic variables (age, gender, region, education, marital status), BMI, smoking, and drinking status, chronic diseases, CES-D scale score, and SES

**Supplementary Table S13. Sensitivity Analysis - Association between ADL/IADL status and mortality rate (Complete Case Analysis)**

| Cohort | | CHARLS (n=5,795) | | ELSA (n=5,836) | | HRS (n=7,454) | | MHAS (n=8,168) | | SHARE (n=15,979) | |
| --- | --- | --- | --- | --- | --- | --- | --- | --- | --- | --- | --- |
| Exposure | | Model 1 | Model 2 | Model 1 | Model 2 | Model 1 | Model 2 | Model 1 | Model 2 | Model 1 | Model 2 |
| ADL Status  Hazard Ratio (95% Confidence Interval) | Disability items= 0 | ref | ref | ref | ref | ref | ref | ref | ref | ref | ref |
| Disability items= 1 | 1.54 (1.03, 2.31) | 1.34 (0.89, 2.02) | 1.36 (0.99, 1.88) | 1.42 (1.03, 1.96) | 1.42 (1.22, 1.65) | 1.15 (0.98, 1.34) | 1.30 (1.09, 1.55) | 1.10 (0.92, 1.32) | 1.42 (1.24, 1.63) | 1.23 (1.07, 1.41) |
| Disability items>= 2 | 2.72 (1.92, 3.85) | 2.31 (1.60, 3.35) | 1.57 (1.12, 2.21) | 1.64 (1.16, 2.32) | 2.00 (1.70, 2.34) | 1.39 (1.17, 1.66) | 2.08 (1.76, 2.46) | 1.60 (1.34, 1.90) | 1.80 (1.58, 2.05) | 1.28 (1.11, 1.47) |
| IADL Status  Hazard Ratio (95% Confidence Interval) | Disability items= 0 | ref | ref | ref | ref | ref | ref | ref | ref | ref | ref |
| Disability items= 1 | 1.73 (1.20, 2.51) | 1.48 (1.01, 2.15) | 1.94 (1.36, 2.77) | 1.64 (1.13, 2.38) | 1.83 (1.57, 2.12) | 1.47 (1.26, 1.71) | 1.52 (1.24, 1.86) | 1.30 (1.06, 1.59) | 1.90 (1.66, 2.17) | 1.59 (1.39, 1.83) |
| Disability items>= 2 | 2.29 (1.62, 3.23) | 2.03 (1.41, 2.92) | 2.19 (1.35, 3.56) | 1.65 (0.99, 2.74) | 2.27 (1.92, 2.68) | 1.55 (1.30, 1.86) | 2.80 (2.39, 3.28) | 2.34 (1.99, 2.75) | 2.14 (1.87, 2.45) | 1.62 (1.40, 1.87) |

Abbreviations: CHARLS: China Health and Retirement Longitudinal Study; ELSA: English Longitudinal Study of Ageing; HRS: Health and Retirement Study; SHARE: Survey of Health, Ageing and Retirement in Europe; MHAS: Mexican Health and Aging Study. ADL: Activities of Daily Living; IADL: Instrumental Activities of Daily Living

Model 1 was adjusted for demographic variables (age, gender, region, education, marital status), BMI, smoking, and drinking status; Model 2 further adjusted for chronic diseases, CES-D scale score, and SES.

**Supplementary Table S14. Sensitivity Analysis - Association between ADL/IADL status and mortality rate (Exclude individuals who died within the first year of follow-up)**

| Cohort | | CHARLS (n=9,832) | | ELSA (n=7,151) | | HRS (n=20,046) | | MHAS (n=12,102) | | SHARE (n=32,859) | |
| --- | --- | --- | --- | --- | --- | --- | --- | --- | --- | --- | --- |
| Exposure | | Model 1 | Model 2 | Model 1 | Model 2 | Model 1 | Model 2 | Model 1 | Model 2 | Model 1 | Model 2 |
| ADL Status  Hazard Ratio (95% Confidence Interval) | Disability items= 0 | ref | ref | ref | ref | ref | ref | ref | ref | ref | ref |
| Disability items= 1 | 1.28 (0.80, 2.06) | 1.05 (0.65, 1.71) | 1.44 (1.07, 1.93) | 1.31 (0.96, 1.78) | 1.61 (1.48, 1.75) | 1.37 (1.26, 1.49) | 1.25 (1.09, 1.44) | 1.11 (0.97, 1.28) | 1.36 (1.23, 1.50) | 1.15 (1.03, 1.27) |
| Disability items>= 2 | 2.57 (1.82, 3.65) | 2.06 (1.41, 3.01) | 1.89 (1.43, 2.52) | 1.57 (1.15, 2.15) | 2.35 (2.18, 2.53) | 1.88 (1.74, 2.04) | 1.68 (1.49, 1.90) | 1.43 (1.26, 1.63) | 1.68 (1.53, 1.85) | 1.17 (1.05, 1.30) |
| IADL Status  Hazard Ratio (95% Confidence Interval) | Disability items= 0 | ref | ref | ref | ref | ref | ref | ref | ref | ref | ref |
| Disability items= 1 | 1.44 (0.94, 2.20) | 1.27 (0.82, 1.95) | 1.70 (1.22, 2.37) | 1.48 (1.04, 2.09) | 1.80 (1.66, 1.96) | 1.52 (1.39, 1.65) | 1.43 (1.26, 1.61) | 1.33 (1.17, 1.50) | 1.53 (1.38, 1.69) | 1.27 (1.15, 1.41) |
| Disability items>= 2 | 2.44 (1.73, 3.46) | 2.05 (1.41, 2.97) | 2.73 (1.91, 3.90) | 2.16 (1.47, 3.18) | 2.66 (2.47, 2.87) | 2.04 (1.88, 2.21) | 1.91 (1.67, 2.19) | 1.68 (1.47, 1.93) | 1.81 (1.64, 1.99) | 1.31 (1.18, 1.46) |

Abbreviations: CHARLS: China Health and Retirement Longitudinal Study; ELSA: English Longitudinal Study of Ageing; HRS: Health and Retirement Study; SHARE: Survey of Health, Ageing and Retirement in Europe; MHAS: Mexican Health and Aging Study. ADL: Activities of Daily Living; IADL: Instrumental Activities of Daily Living

Model 1 was adjusted for demographic variables (age, gender, region, education, marital status), BMI, smoking, and drinking status; Model 2 further adjusted for chronic diseases, CES-D scale score, and SES.

**Supplementary Table S15. Sensitivity Analysis - Association between ADL/IADL status and mortality rate (Use wave 14 (2018-2019) as the end of follow-up in HRS)**

| Cohort | | CHARLS (n=10,089) | | ELSA (n=7,218) | | HRS (n=20,702) | | MHAS (n=12,411) | | SHARE (n=33,650) | |
| --- | --- | --- | --- | --- | --- | --- | --- | --- | --- | --- | --- |
| Exposure | | Model 1 | Model 2 | Model 1 | Model 2 | Model 1 | Model 2 | Model 1 | Model 2 | Model 1 | Model 2 |
| ADL Status  Hazard Ratio (95% Confidence Interval) | Disability items= 0 | ref | ref | ref | ref | ref | ref | ref | ref | ref | ref |
| Disability items= 1 | 1.70 (1.26, 2.28) | 1.46 (1.08, 1.97) | 1.58 (1.22, 2.06) | 1.42 (1.08, 1.87) | 1.66 (1.53, 1.80) | 1.43 (1.31, 1.55) | 1.25 (1.09, 1.42) | 1.10 (0.96, 1.25) | 1.42 (1.30, 1.56) | 1.19 (1.09, 1.31) |
| Disability items>= 2 | 3.44 (2.77, 4.27) | 2.71 (2.13, 3.44) | 1.84 (1.42, 2.39) | 1.52 (1.14, 2.03) | 2.72 (2.54, 2.91) | 2.22 (2.06, 2.39) | 1.84 (1.65, 2.06) | 1.57 (1.40, 1.76) | 1.99 (1.84, 2.16) | 1.41 (1.29, 1.54) |
| IADL Status  Hazard Ratio (95% Confidence Interval) | Disability items= 0 | ref | ref | ref | ref | ref | ref | ref | ref | ref | ref |
| Disability items= 1 | 1.52 (1.13, 2.03) | 1.31 (0.98, 1.76) | 1.87 (1.39, 2.51) | 1.63 (1.20, 2.21) | 1.92 (1.77, 2.08) | 1.60 (1.48, 1.74) | 1.45 (1.29, 1.63) | 1.33 (1.18, 1.50) | 1.63 (1.49, 1.79) | 1.34 (1.22, 1.47) |
| Disability items>= 2 | 3.45 (2.78, 4.29) | 2.78 (2.20, 3.52) | 2.70 (1.95, 3.75) | 2.15 (1.52, 3.05) | 2.97 (2.76, 3.18) | 2.26 (2.10, 2.44) | 2.19 (1.94, 2.47) | 1.89 (1.67, 2.13) | 2.11 (1.94, 2.29) | 1.55 (1.41, 1.70) |

Abbreviations: CHARLS: China Health and Retirement Longitudinal Study; ELSA: English Longitudinal Study of Ageing; HRS: Health and Retirement Study; SHARE: Survey of Health, Ageing and Retirement in Europe; MHAS: Mexican Health and Aging Study. ADL: Activities of Daily Living; IADL: Instrumental Activities of Daily Living

Model 1 was adjusted for demographic variables (age, gender, region, education, marital status), BMI, smoking, and drinking status; Model 2 further adjusted for chronic diseases, CES-D scale score, and SES.

**Supplementary Table S16. Sensitivity Analysis - Association between ADL/IADL status and mortality rate (Unadjusted for chronic diseases in Model 2)**

| Cohort | | CHARLS (n=10,089) | | ELSA (n=7,218) | | HRS (n=20,702) | | MHAS (n=12,411) | | SHARE (n=33,650) | |
| --- | --- | --- | --- | --- | --- | --- | --- | --- | --- | --- | --- |
| Exposure | | Model 1 | Model 2 | Model 1 | Model 2 | Model 1 | Model 2 | Model 1 | Model 2 | Model 1 | Model 2 |
| ADL Status  Hazard Ratio (95% Confidence Interval) | Disability items= 0 | ref | ref | ref | ref | ref | ref | ref | ref | ref | ref |
| Disability items= 1 | 1.70 (1.26, 2.28) | 1.56 (1.16, 2.11) | 1.58 (1.22, 2.06) | 1.59 (1.21, 2.08) | 1.65 (1.52, 1.78) | 1.56 (1.44, 1.70) | 1.25 (1.09, 1.42) | 1.16 (1.01, 1.32) | 1.42 (1.30, 1.56) | 1.23 (1.12, 1.35) |
| Disability items>= 2 | 3.44 (2.77, 4.27) | 2.91 (2.29, 3.69) | 1.84 (1.42, 2.39) | 1.74 (1.31, 2.31) | 2.62 (2.45, 2.80) | 2.43 (2.26, 2.62) | 1.84 (1.65, 2.06) | 1.69 (1.51, 1.90) | 1.99 (1.84, 2.16) | 1.44 (1.32, 1.58) |
| IADL Status  Hazard Ratio (95% Confidence Interval) | Disability items= 0 | ref | ref | ref | ref | ref | ref | ref | ref | ref | ref |
| Disability items= 1 | 1.52 (1.13, 2.03) | 1.38 (1.03, 1.86) | 1.87 (1.39, 2.51) | 1.77 (1.30, 2.40) | 1.92 (1.77, 2.07) | 1.75 (1.62, 1.89) | 1.45 (1.29, 1.63) | 1.39 (1.23, 1.56) | 1.63 (1.49, 1.79) | 1.38 (1.26, 1.52) |
| Disability items>= 2 | 3.45 (2.78, 4.29) | 2.94 (2.32, 3.73) | 2.70 (1.95, 3.75) | 2.46 (1.74, 3.48) | 2.92 (2.73, 3.13) | 2.59 (2.40, 2.78) | 2.19 (1.94, 2.47) | 2.01 (1.78, 2.27) | 2.11 (1.94, 2.29) | 1.57 (1.43, 1.73) |

Abbreviations: CHARLS: China Health and Retirement Longitudinal Study; ELSA: English Longitudinal Study of Ageing; HRS: Health and Retirement Study; SHARE: Survey of Health, Ageing and Retirement in Europe; MHAS: Mexican Health and Aging Study. ADL: Activities of Daily Living; IADL: Instrumental Activities of Daily Living

Model 1 was adjusted for demographic variables (age, gender, region, education, marital status), BMI, smoking, and drinking status; Model 2 further adjusted for CES-D scale score, and SES.

**Supplementary Table S17. Sensitivity Analysis - Association between ADL/IADL status and mortality rate (Exposure using the complete ADL/IADL scale data for each cohort)**

| Cohort | | CHARLS (n=10,089) | | ELSA (n=7,218) | | HRS (n=20,702) | | MHAS (n=12,411) | | SHARE (n=33,650) | |
| --- | --- | --- | --- | --- | --- | --- | --- | --- | --- | --- | --- |
| Exposure | | Model 1 | Model 2 | Model 1 | Model 2 | Model 1 | Model 2 | Model 1 | Model 2 | Model 1 | Model 2 |
| ADL Status  Hazard Ratio (95% Confidence Interval) | Disability items= 0 | ref | ref | ref | ref | ref | ref | ref | ref | ref | ref |
| Disability items= 1 | 1.63 (1.21, 2.19) | 1.30 (0.96, 1.77) | 1.60 (1.22, 2.08) | 1.41 (1.08, 1.86) | 1.63 (1.51, 1.76) | 1.42 (1.30, 1.54) | 1.27 (1.12, 1.45) | 1.13 (0.99, 1.29) | 1.38 (1.26, 1.52) | 1.17 (1.06, 1.29) |
| Disability items>= 2 | 3.41 (2.74, 4.24) | 2.60 (2.04, 3.31) | 1.87 (1.45, 2.43) | 1.46 (1.10, 1.95) | 2.63 (2.47, 2.81) | 2.11 (1.97, 2.27) | 1.80 (1.62, 2.00) | 1.53 (1.37, 1.70) | 2.00 (1.85, 2.17) | 1.38 (1.26, 1.51) |
| IADL Status  Hazard Ratio (95% Confidence Interval) | Disability items= 0 | ref | ref | ref | ref | ref | ref | ref | ref | ref | ref |
| Disability items= 1 | 0.93 (0.69, 1.26) | 0.80 (0.60, 1.09) | 2.20 (1.72, 2.83) | 1.95 (1.50, 2.52) | 1.57 (1.46, 1.68) | 1.36 (1.26, 1.46) | 1.45 (1.29, 1.63) | 1.33 (1.18, 1.50) | 1.50 (1.38, 1.63) | 1.30 (1.19, 1.41) |
| Disability items>= 2 | 2.73 (2.20, 3.40) | 2.11 (1.67, 2.67) | 2.73 (2.12, 3.52) | 2.19 (1.65, 2.91) | 2.73 (2.55, 2.91) | 2.06 (1.92, 2.21) | 2.19 (1.94, 2.47) | 1.89 (1.67, 2.13) | 2.08 (1.93, 2.23) | 1.51 (1.39, 1.64) |

Abbreviations: CHARLS: China Health and Retirement Longitudinal Study; ELSA: English Longitudinal Study of Ageing; HRS: Health and Retirement Study; SHARE: Survey of Health, Ageing and Retirement in Europe; MHAS: Mexican Health and Aging Study. ADL: Activities of Daily Living; IADL: Instrumental Activities of Daily Living

Model 1 was adjusted for demographic variables (age, gender, region, education, marital status), BMI, smoking, and drinking status; Model 2 further adjusted for chronic diseases, CES-D scale score, and SES.

**Supplementary Table S18. Description of samples included and excluded**

| **Cohort** | **CHARLS** | | **ELSA** | | **HRS** | | **MHAS** | | **SHARE** | |
| --- | --- | --- | --- | --- | --- | --- | --- | --- | --- | --- |
| Variable | Excluded in the final analysis (n=3,354) | Included in the final analysis (n=10,089) | Excluded in the final analysis  (n=2,210) | Included in the final analysis (n=7,218) | Excluded in the final analysis (n=969) | Included in the final analysis (n=20,702) | Excluded in the final analysis (n=1,665) | Included in the final analysis (n=12,411) | Excluded in the final analysis (n=1,136) | Included in the final analysis (n=33,650) |
| Age (Year), Median (Q₁, Q₃) | 47.0 (45.0, 48.0) | 59.0 (55.0, 65.0) | 67.0 (56.0, 77.0) | 64.0 (57.0, 72.0) | 46.0 (43.0, 48.0) | 66.0 (57.0, 75.0) | 46.0 (42.0, 48.0) | 60.0 (54.0, 68.0) | 47.0 (45.0, 49.0) | 64.0 (57.0, 72.0) |
| BMI (Kg/m2), Median (Q₁, Q₃) | 23.8 (21.7, 26.4) | 23.0 (20.7, 25.5) | 27.4 (24.6, 30.7) | 27.3 (24.7, 30.5) | 29.3 (25.3, 34.9) | 29.0 (25.5, 33.2) | 27.3 (24.7, 31.0) | 26.7 (24.0, 29.7) | 24.8 (22.5, 28.1) | 26.2 (23.8, 29.1) |
| CES-D, Median (Q₁, Q₃) | 6.0 (3.0, 11.0) | 7.0 (4.0, 13.0) | 1.0 (0.0, 3.0) | 1.0 (0.0, 2.0) | 1.0 (0.0, 3.0) | 1.0 (0.0, 2.0) | 3.0 (1.0, 5.0) | 3.0 (1.0, 6.0) | 0.0 (0.0, 2.0) | 1.0 (0.0, 2.0) |
| Total household income, Median (Q₁, Q₃) | 16545.0 (4545.0, 39715.0) | 10500.0 (2300.0, 32400.0) | 14387.8 (9245.9, 22203.4) | 17140.8 (10673.5, 26216.0) | 60000.0 (28400.0, 106200.0) | 38256.0 (18816.0, 74861.0) | 41000.0 (19444.1, 84052.2) | 20400.0 (1800.0, 52800.0) | 18149.0 (5823.2, 39990.0) | 16384.5 (7680.0, 29673.2) |
| **Sex, n (%)** |  |  |  |  |  |  |  |  |  |  |
| Female | 1966 (58.6) | 5216 (51.7) | 1425 (64.5) | 3878 (53.7) | 233 (24.0) | 8821 (42.6) | 1447 (86.9) | 6727 (54.2) | 1006 (88.6) | 18357 (54.6) |
| Male | 1388 (41.4) | 4873 (48.3) | 785 (35.5) | 3340 (46.3) | 736 (76.0) | 11881 (57.4) | 218 (13.1) | 5684 (45.8) | 130 (11.4) | 15293 (45.4) |
| **Education, n (%)** |  |  |  |  |  |  |  |  |  |  |
| Less than high school | 2852 (85.0) | 9078 (90.0) | 766 (34.7) | 2857 (39.6) | 168 (17.3) | 4090 (19.8) | 1454 (87.3) | 11225 (90.4) | 404 (35.6) | 16509 (49.1) |
| College or above | 63 (1.9) | 127 (1.3) | 139 (6.3) | 1032 (14.3) | 481 (49.6) | 9580 (46.3) | 143 (8.6) | 921 (7.4) | 259 (22.8) | 6431 (19.1) |
| High school or equivalent | 439 (13.1) | 884 (8.8) | 503 (22.8) | 3329 (46.1) | 320 (33.0) | 7032 (34.0) | 68 (4.1) | 265 (2.1) | 473 (41.6) | 10710 (31.8) |
| Miss | 0 (0.0) | 0 (0.0) | 802 (36.3) | 0 (0.0) | 0 (0.0) | 0 (0.0) | 0 (0.0) | 0 (0.0) | 0 (0.0) | 0 (0.0) |
| **Marita Status, n (%)** |  |  |  |  |  |  |  |  |  |  |
| Married | 3233 (96.4) | 8830 (87.5) | 1315 (59.5) | 5061 (70.1) | 800 (82.6) | 12583 (60.8) | 1639 (98.4) | 9470 (76.3) | 1056 (93.0) | 24883 (74.0) |
| Unmarried | 121 (3.6) | 1259 (12.5) | 895 (40.5) | 2157 (29.9) | 169 (17.4) | 8119 (39.2) | 26 (1.6) | 2941 (23.7) | 80 (7.0) | 8767 (26.1) |
| **Region, n (%)** |  |  |  |  |  |  |  |  |  |  |
| Rural | 2138 (63.7) | 6442 (63.9) | NA | NA | 206 (21.3) | 5872 (28.4) | 399 (24.0) | 3189 (25.7) | 339 (29.8) | 9328 (27.7) |
| Urban | 1216 (36.3) | 3647 (36.1) | NA | NA | 763 (78.7) | 14830 (71.6) | 1266 (76.0) | 9222 (74.3) | 797 (70.2) | 24322 (72.3) |
| **Alcohol Consumption, n (%)** |  |  |  |  |  |  |  |  |  |  |
| Never | 2145 (64.0) | 6098 (60.4) | 111 (5.0) | 771 (10.7) | 320 (33.0) | 9270 (44.8) | 1152 (69.2) | 8526 (68.7) | 234 (20.6) | 5439 (16.2) |
| Ever | 1198 (35.7) | 3991 (39.6) | 814 (36.8) | 6447 (89.3) | 649 (67.0) | 11432 (55.2) | 509 (30.6) | 3885 (31.3) | 902 (79.4) | 28211 (83.8) |
| Miss | 11 (0.3) | 0 (0.0) | 1285 (58.1) | 0 (0.0) | 0 (0.0) | 0 (0.0) | 4 (0.2) | 0 (0.0) | 0 (0.0) | 0 (0.0) |
| **Smoking, n (%)** |  |  |  |  |  |  |  |  |  |  |
| Never | 2279 (67.9) | 6008 (59.6) | 834 (37.7) | 2644 (36.6) | 454 (46.9) | 8944 (43.2) | 1142 (68.6) | 6916 (55.7) | 612 (53.9) | 17649 (52.4) |
| Ever | 1075 (32.1) | 4081 (40.4) | 1375 (62.2) | 4574 (63.4) | 515 (53.1) | 11758 (56.8) | 521 (31.3) | 5495 (44.3) | 524 (46.1) | 16001 (47.6) |
| Miss | 0 (0.0) | 0 (0.0) | 1 (0.0) | 0 (0.0) | 0 (0.0) | 0 (0.0) | 2 (0.1) | 0 (0.0) | 0 (0.0) | 0 (0.0) |
| **Dressing, n (%)** |  |  |  |  |  |  |  |  |  |  |
| Not disabled | 3255 (97.0) | 9461 (93.8) | 1848 (83.6) | 6295 (87.2) | 915 (94.4) | 18221 (88.0) | 1619 (97.2) | 11495 (92.6) | 1121 (98.7) | 31179 (92.7) |
| Disabled | 57 (1.7) | 511 (5.1) | 362 (16.4) | 923 (12.8) | 53 (5.5) | 2465 (11.9) | 37 (2.2) | 858 (6.9) | 15 (1.3) | 2471 (7.3) |
| Miss | 42 (1.3) | 117 (1.2) | 0 (0.0) | 0 (0.0) | 1 (0.1) | 16 (0.1) | 9 (0.5) | 58 (0.5) | 0 (0.0) | 0 (0.0) |
| **Bathing, n (%)** |  |  |  |  |  |  |  |  |  |  |
| Not disabled | 3238 (96.5) | 9333 (92.5) | 1835 (83.0) | 6463 (89.5) | 937 (96.7) | 18884 (91.2) | 1634 (98.1) | 11865 (95.6) | 1130 (99.5) | 31787 (94.5) |
| Disabled | 75 (2.2) | 634 (6.3) | 375 (17.0) | 755 (10.5) | 32 (3.3) | 1804 (8.7) | 13 (0.8) | 394 (3.2) | 6 (0.5) | 1863 (5.5) |
| Miss | 41 (1.2) | 122 (1.2) | 0 (0.0) | 0 (0.0) | 0 (0.0) | 14 (0.1) | 18 (1.1) | 152 (1.2) | 0 (0.0) | 0 (0.0) |
| **Eating, n (%)** |  |  |  |  |  |  |  |  |  |  |
| Not disabled | 3285 (97.9) | 9681 (96.0) | 2115 (95.7) | 7091 (98.2) | 956 (98.7) | 19767 (95.5) | 1639 (98.4) | 12058 (97.2) | 1131 (99.6) | 33082 (98.3) |
| Disabled | 28 (0.8) | 293 (2.9) | 95 (4.3) | 127 (1.8) | 13 (1.3) | 904 (4.4) | 8 (0.5) | 199 (1.6) | 5 (0.4) | 568 (1.7) |
| Miss | 41 (1.2) | 115 (1.1) | 0 (0.0) | 0 (0.0) | 0 (0.0) | 31 (0.1) | 18 (1.1) | 154 (1.2) | 0 (0.0) | 0 (0.0) |
| **Get in/out of bed, n (%)** |  |  |  |  |  |  |  |  |  |  |
| Not disabled | 3254 (97.0) | 9399 (93.2) | 2043 (92.4) | 6783 (94.0) | 920 (94.9) | 19024 (91.9) | 1611 (96.8) | 11646 (93.8) | 1119 (98.5) | 32332 (96.1) |
| Disabled | 59 (1.8) | 574 (5.7) | 167 (7.6) | 435 (6.0) | 49 (5.1) | 1653 (8.0) | 36 (2.2) | 615 (5.0) | 17 (1.5) | 1318 (3.9) |
| Miss | 41 (1.2) | 116 (1.1) | 0 (0.0) | 0 (0.0) | 0 (0.0) | 25 (0.1) | 18 (1.1) | 150 (1.2) | 0 (0.0) | 0 (0.0) |
| **Using the toilet, n (%)** |  |  |  |  |  |  |  |  |  |  |
| Not disabled | 3167 (94.4) | 8726 (86.5) | 2107 (95.3) | 7010 (97.1) | 945 (97.5) | 19199 (92.7) | 1622 (97.4) | 11827 (95.3) | 1134 (99.8) | 32881 (97.7) |
| Disabled | 146 (4.4) | 1246 (12.4) | 103 (4.7) | 208 (2.9) | 24 (2.5) | 1463 (7.1) | 23 (1.4) | 421 (3.4) | 2 (0.2) | 769 (2.3) |
| Miss | 41 (1.2) | 117 (1.2) | 0 (0.0) | 0 (0.0) | 0 (0.0) | 40 (0.2) | 20 (1.2) | 163 (1.3) | 0 (0.0) | 0 (0.0) |
| **Managing money, n (%)** |  |  |  |  |  |  |  |  |  |  |
| Not disabled | 3142 (93.7) | 8737 (86.6) | 2042 (92.4) | 7074 (98.0) | 896 (92.5) | 18283 (88.3) | 1651 (99.2) | 12033 (97.0) | 1126 (99.1) | 32282 (95.9) |
| Disabled | 203 (6.1) | 1322 (13.1) | 168 (7.6) | 144 (2.0) | 61 (6.3) | 1825 (8.8) | 9 (0.5) | 310 (2.5) | 10 (0.9) | 1368 (4.1) |
| Miss | 9 (0.3) | 30 (0.3) | 0 (0.0) | 0 (0.0) | 12 (1.2) | 594 (2.9) | 5 (0.3) | 68 (0.5) | 0 (0.0) | 0 (0.0) |
| **Take medications, n (%)** |  |  |  |  |  |  |  |  |  |  |
| Not disabled | 3226 (96.2) | 9378 (93.0) | 2092 (94.7) | 7131 (98.8) | 922 (95.1) | 19419 (93.8) | 1652 (99.2) | 12031 (96.9) | 1131 (99.6) | 33023 (98.1) |
| Disabled | 122 (3.6) | 694 (6.9) | 118 (5.3) | 87 (1.2) | 29 (3.0) | 997 (4.8) | 8 (0.5) | 327 (2.6) | 5 (0.4) | 627 (1.9) |
| Miss | 6 (0.2) | 17 (0.2) | 0 (0.0) | 0 (0.0) | 18 (1.9) | 286 (1.4) | 5 (0.3) | 53 (0.4) | 0 (0.0) | 0 (0.0) |
| **Shop for grocery, n (%)** |  |  |  |  |  |  |  |  |  |  |
| Not disabled | 3240 (96.6) | 9163 (90.8) | 1852 (83.8) | 6643 (92.0) | 928 (95.8) | 18055 (87.2) | 1625 (97.6) | 11225 (90.4) | 1118 (98.4) | 31374 (93.2) |
| Disabled | 111 (3.3) | 911 (9.0) | 358 (16.2) | 575 (8.0) | 39 (4.0) | 2269 (11.0) | 25 (1.5) | 819 (6.6) | 18 (1.6) | 2276 (6.8) |
| Miss | 3 (0.1) | 15 (0.1) | 0 (0.0) | 0 (0.0) | 2 (0.2) | 378 (1.8) | 15 (0.9) | 367 (3.0) | 0 (0.0) | 0 (0.0) |
| **Prepare hot meal, n (%)** |  |  |  |  |  |  |  |  |  |  |
| Not disabled | 3251 (96.9) | 9221 (91.4) | 1998 (90.4) | 6950 (96.3) | 939 (96.9) | 18516 (89.4) | 1625 (97.6) | 11208 (90.3) | 1129 (99.4) | 32301 (96.0) |
| Disabled | 100 (3.0) | 861 (8.5) | 212 (9.6) | 268 (3.7) | 23 (2.4) | 1630 (7.9) | 13 (0.8) | 489 (3.9) | 7 (0.6) | 1349 (4.0) |
| Miss | 3 (0.1) | 7 (0.1) | 0 (0.0) | 0 (0.0) | 7 (0.7) | 556 (2.7) | 27 (1.6) | 714 (5.8) | 0 (0.0) | 0 (0.0) |
| **High blood pressure, n (%)** |  |  |  |  |  |  |  |  |  |  |
| Never diagnosed | 2814 (83.9) | 7305 (72.4) | 1285 (58.1) | 4296 (59.5) | 669 (69.0) | 8736 (42.2) | 1118 (67.1) | 7386 (59.5) | 963 (84.8) | 20281 (60.3) |
| Ever diagnosed | 503 (15.0) | 2735 (27.1) | 925 (41.9) | 2922 (40.5) | 300 (31.0) | 11966 (57.8) | 489 (29.4) | 4665 (37.6) | 171 (15.1) | 13337 (39.6) |
| Miss | 37 (1.1) | 49 (0.5) | 0 (0.0) | 0 (0.0) | 0 (0.0) | 0 (0.0) | 58 (3.5) | 360 (2.9) | 2 (0.2) | 32 (0.1) |
| **Diabetes, n (%)** |  |  |  |  |  |  |  |  |  |  |
| Never diagnosed | 3201 (95.4) | 9389 (93.1) | 2019 (91.4) | 6661 (92.3) | 843 (87.0) | 16174 (78.1) | 1442 (86.6) | 10104 (81.4) | 1094 (96.3) | 29478 (87.6) |
| Ever diagnosed | 115 (3.4) | 606 (6.0) | 191 (8.6) | 557 (7.7) | 126 (13.0) | 4528 (21.9) | 168 (10.1) | 1955 (15.8) | 40 (3.5) | 4138 (12.3) |
| Miss | 38 (1.1) | 94 (0.9) | 0 (0.0) | 0 (0.0) | 0 (0.0) | 0 (0.0) | 55 (3.3) | 352 (2.8) | 2 (0.2) | 34 (0.1) |
| **Cancer, n (%)** |  |  |  |  |  |  |  |  |  |  |
| Never diagnosed | 3308 (98.6) | 9943 (98.6) | 2032 (91.9) | 6721 (93.1) | 921 (95.0) | 17836 (86.2) | 1574 (94.5) | 11839 (95.4) | 1116 (98.2) | 31507 (93.6) |
| Ever diagnosed | 27 (0.8) | 91 (0.9) | 178 (8.1) | 497 (6.9) | 48 (5.0) | 2866 (13.8) | 35 (2.1) | 230 (1.9) | 18 (1.6) | 2108 (6.3) |
| Miss | 19 (0.6) | 55 (0.5) | 0 (0.0) | 0 (0.0) | 0 (0.0) | 0 (0.0) | 56 (3.4) | 342 (2.8) | 2 (0.2) | 35 (0.1) |
| **Lung disease, n (%)** |  |  |  |  |  |  |  |  |  |  |
| Never diagnosed | 3151 (93.9) | 9081 (90.0) | 2054 (92.9) | 6788 (94.0) | 924 (95.4) | 18793 (90.8) | 1527 (91.7) | 11321 (91.2) | 1112 (97.9) | 31443 (93.4) |
| Ever diagnosed | 184 (5.5) | 965 (9.6) | 156 (7.1) | 430 (6.0) | 45 (4.6) | 1909 (9.2) | 82 (4.9) | 756 (6.1) | 22 (1.9) | 2171 (6.5) |
| Miss | 19 (0.6) | 43 (0.4) | 0 (0.0) | 0 (0.0) | 0 (0.0) | 0 (0.0) | 56 (3.4) | 334 (2.7) | 2 (0.2) | 36 (0.1) |
| **Heart conditions, n (%)** |  |  |  |  |  |  |  |  |  |  |
| Never diagnosed | 3107 (92.6) | 8793 (87.2) | 1727 (78.1) | 6007 (83.2) | 909 (93.8) | 15975 (77.2) | NA | NA | 1103 (97.1) | 28521 (84.8) |
| Ever diagnosed | 224 (6.7) | 1235 (12.2) | 483 (21.9) | 1211 (16.8) | 60 (6.2) | 4727 (22.8) | NA | NA | 31 (2.7) | 5097 (15.1) |
| Miss | 23 (0.7) | 61 (0.6) | 0 (0.0) | 0 (0.0) | 0 (0.0) | 0 (0.0) | NA | NA | 2 (0.2) | 32 (0.1) |
| **Stroke, n (%)** |  |  |  |  |  |  |  |  |  |  |
| Never diagnosed | 3300 (98.4) | 9809 (97.2) | 2051 (92.8) | 6934 (96.1) | 935 (96.5) | 18920 (91.4) | 1594 (95.7) | 11754 (94.7) | 1126 (99.1) | 31997 (95.1) |
| Ever diagnosed | 40 (1.2) | 249 (2.5) | 159 (7.2) | 284 (3.9) | 34 (3.5) | 1782 (8.6) | 14 (0.8) | 309 (2.5) | 8 (0.7) | 1617 (4.8) |
| Miss | 14 (0.4) | 31 (0.3) | 0 (0.0) | 0 (0.0) | 0 (0.0) | 0 (0.0) | 57 (3.4) | 348 (2.8) | 2 (0.2) | 36 (0.1) |
| **Arthritis, n (%)** |  |  |  |  |  |  |  |  |  |  |
| Never diagnosed | 2456 (73.2) | 6542 (64.8) | 1448 (65.5) | 4740 (65.7) | 780 (80.5) | 9363 (45.2) | 1439 (86.4) | 9542 (76.9) | 1017 (89.5) | 25079 (74.5) |
| Ever diagnosed | 884 (26.4) | 3520 (34.9) | 762 (34.5) | 2478 (34.3) | 189 (19.5) | 11339 (54.8) | 170 (10.2) | 2520 (20.3) | 117 (10.3) | 8537 (25.4) |
| Miss | 14 (0.4) | 27 (0.3) | 0 (0.0) | 0 (0.0) | 0 (0.0) | 0 (0.0) | 56 (3.4) | 349 (2.8) | 2 (0.2) | 34 (0.1) |

Abbreviations: CHARLS: China Health and Retirement Longitudinal Study; ELSA: English Longitudinal Study of Ageing; HRS: Health and Retirement Study; SHARE: Survey of Health, Ageing and Retirement in Europe; MHAS: Mexican Health and Aging Study; CES-D: Center for Epidemiologic Studies Depression; NA: not applicable.
