# Supplementary material
Source: Research Square preprint supplement (doi:10.21203/rs.3.rs-7084168/v1)
Supplement: Supplementary file 1 [file 5324bf531b62d17e76e66841.pdf]

# Associations of activities of daily living disability and instrumental activities of daily living disability with all-cause mortality: Evidence from Five Major Longitudinal Studies

## The Study

### Design:

Population based, multi-prospective cohorts study.

### Participants:

Adults aged 50 years or older across regions in the North America, Europe, and Asia, represented in five longitudinal studies (ELSA, HRS, SHARE, MHAS, and CHARLS).

### Exposures:

Activities of daily living (ADL) and instrumental activities of daily living (IADL) disability.

### Outcomes:

Single and pooled risk for all-cause mortality

### Analysis:

Kaplan-Meier curve; Cox regression; Meta-analytic random-effects model; Mediation analysis; Interaction analysis

## Hypothesis

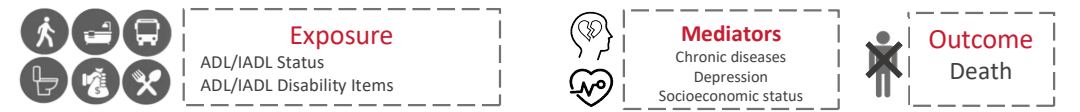

## Findings

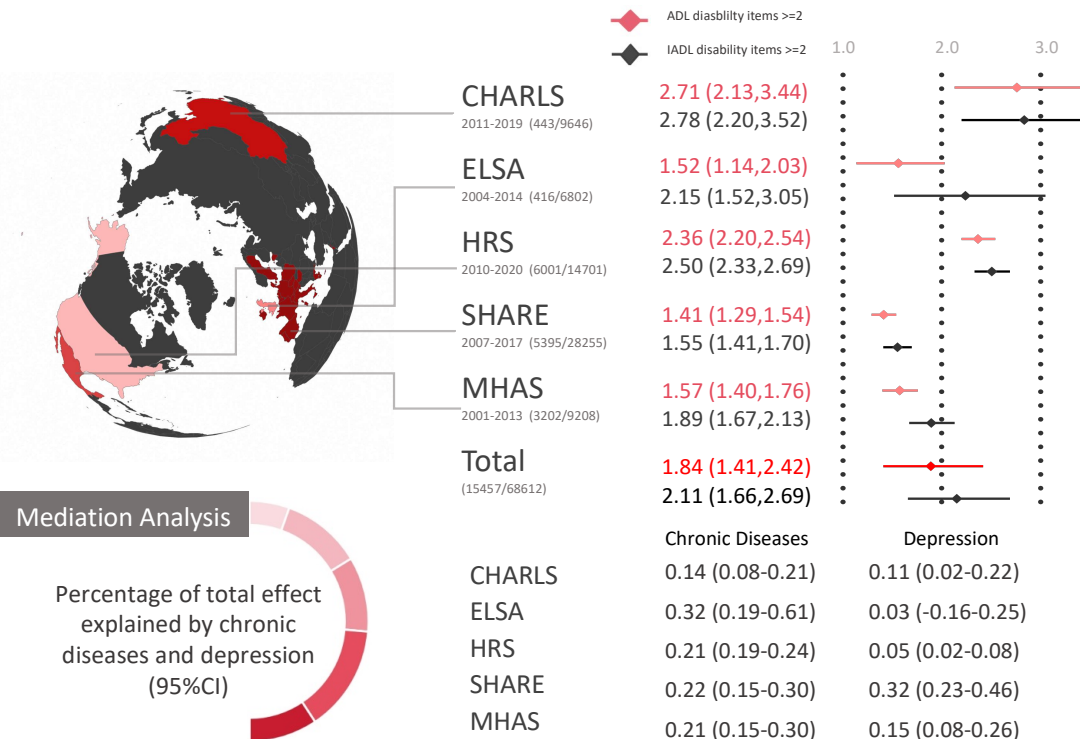

## Interpretation

ADL/IADL disability is associated with a strong increase in the risk of mortality. Healthcare services need to be more inclusive to reduce mortality among middle-aged and older people with disabilities
