# Supplementary material
Source: Research Square preprint supplement (doi:10.21203/rs.3.rs-7084168/v1)
Supplement: Supplementary file 2 [file e8553b2550dec4025828b60f.docx]

STROBE Statement—Checklist of items that should be included in reports of ***cohort studies***

|  | Item No | Recommendation | Page No |
| --- | --- | --- | --- |
| **Title and abstract** | 1 | (*a*) Indicate the study’s design with a commonly used term in the title or the abstract | Page 2, Line 8 |
| (*b*) Provide in the abstract an informative and balanced summary of what was done and what was found | Page 2, Line 1 |
| Introduction | | | |
| Background/rationale | 2 | Explain the scientific background and rationale for the investigation being reported | Page 4, Line 2-17 |
| Objectives | 3 | State specific objectives, including any prespecified hypotheses | Page 5, Line 16-19 |
| Methods | | | |
| Study design | 4 | Present key elements of study design early in the paper | Page 7, Line 16-18 |
| Setting | 5 | Describe the setting, locations, and relevant dates, including periods of recruitment, exposure, follow-up, and data collection | Page 5, Line 23-30 |
| Participants | 6 | (*a*) Give the eligibility criteria, and the sources and methods of selection of participants. Describe methods of follow-up | This study is a retrospective study based on existing data, so this item is not applicable to this study |
| (*b*)For matched studies, give matching criteria and number of exposed and unexposed | NA |
| Variables | 7 | Clearly define all outcomes, exposures, predictors, potential confounders, and effect modifiers. Give diagnostic criteria, if applicable | Page 6, Line 2-28  Page 7, Line 1-8 |
| Data sources/ measurement | 8* | For each variable of interest, give sources of data and details of methods of assessment (measurement). Describe comparability of assessment methods if there is more than one group | Supplementary Table S1-S4 |
| Bias | 9 | Describe any efforts to address potential sources of bias | Page 7, Line 18-23  Supplementary Table S5 |
| Study size | 10 | Explain how the study size was arrived at | We take the principle that ‘more is better’ |
| Quantitative variables | 11 | Explain how quantitative variables were handled in the analyses. If applicable, describe which groupings were chosen and why | Supplementary Table S1 |
| Statistical methods | 12 | (*a*) Describe all statistical methods, including those used to control for confounding | Page 7, Line 10-30  Page 8, Line 1-16 |
| (*b*) Describe any methods used to examine subgroups and interactions | Page 7, Line 25-29 |
| (*c*) Explain how missing data were addressed | Page 8, Line 10-13 |
| (*d*) If applicable, explain how loss to follow-up was addressed | Page 7, Line 5-8 |
| (*e*) Describe any sensitivity analyses | Supplementary Table S5 |
| Results | | |  |
| Participants | 13* | (a) Report numbers of individuals at each stage of study—eg numbers potentially eligible, examined for eligibility, confirmed eligible, included in the study, completing follow-up, and analysed | Supplementary Figure S4 |
| (b) Give reasons for non-participation at each stage | This study is a retrospective study based on existing data, so this item is not applicable to this study |
| (c) Consider use of a flow diagram | Supplementary Figure S4 |
| Descriptive data | 14* | (a) Give characteristics of study participants (eg demographic, clinical, social) and information on exposures and potential confounders | Page 9, Line 1-6 |
| (b) Indicate number of participants with missing data for each variable of interest | Supplementary Table S6 |
| (c) Summarise follow-up time (eg, average and total amount) | Table 1 |
| Outcome data | 15* | Report numbers of outcome events or summary measures over time | Page 9, Line 1-6 |

| Main results | 16 | (*a*) Give unadjusted estimates and, if applicable, confounder-adjusted estimates and their precision (eg, 95% confidence interval). Make clear which confounders were adjusted for and why they were included | Table 2  Page 9, Line 8-16 |
| --- | --- | --- | --- |
| (*b*) Report category boundaries when continuous variables were categorized | Supplementary Table S1 |
| (*c*) If relevant, consider translating estimates of relative risk into absolute risk for a meaningful time period | NA |
| Other analyses | 17 | Report other analyses done—eg analyses of subgroups and interactions, and sensitivity analyses | Page 9, Line 16-Page 10, Line 23 |
| Discussion | | | |
| Key results | 18 | Summarise key results with reference to study objectives | Page 10, Line 26-Page 11, Line 10 |
| Limitations | 19 | Discuss limitations of the study, taking into account sources of potential bias or imprecision. Discuss both direction and magnitude of any potential bias | Page 14, Line 6-26 |
| Interpretation | 20 | Give a cautious overall interpretation of results considering objectives, limitations, multiplicity of analyses, results from similar studies, and other relevant evidence | Page 14, Line 29-Page 15, Line 11 |
| Generalisability | 21 | Discuss the generalisability (external validity) of the study results | Page 13, Line 29-30 |
| Other information | | | |
| Funding | 22 | Give the source of funding and the role of the funders for the present study and, if applicable, for the original study on which the present article is based | Page 8, Line 23-25 |

*Give information separately for exposed and unexposed groups.

**Note:** An Explanation and Elaboration article discusses each checklist item and gives methodological background and published examples of transparent reporting. The STROBE checklist is best used in conjunction with this article (freely available on the Web sites of PLoS Medicine at http://www.plosmedicine.org/, Annals of Internal Medicine at http://www.annals.org/, and Epidemiology at http://www.epidem.com/). Information on the STROBE Initiative is available at http://www.strobe-statement.org.
